# Supplementary material for: Massive reshaping of genome–nuclear lamina interactions during oncogene-induced senescence
Source: PubMed Central journal article supplement — Genome Res. 2017 Oct;27(10):1634–44. doi: 10.1101/gr.225763.117 (PMC5630027; doi:10.1101/gr.225763.117), 2017-10
Supplement: supp_gr.225763.117_Supplemental_Fig_S1.pdf [file supp_gr.225763.117_Supplemental_Fig_S1.pdf]

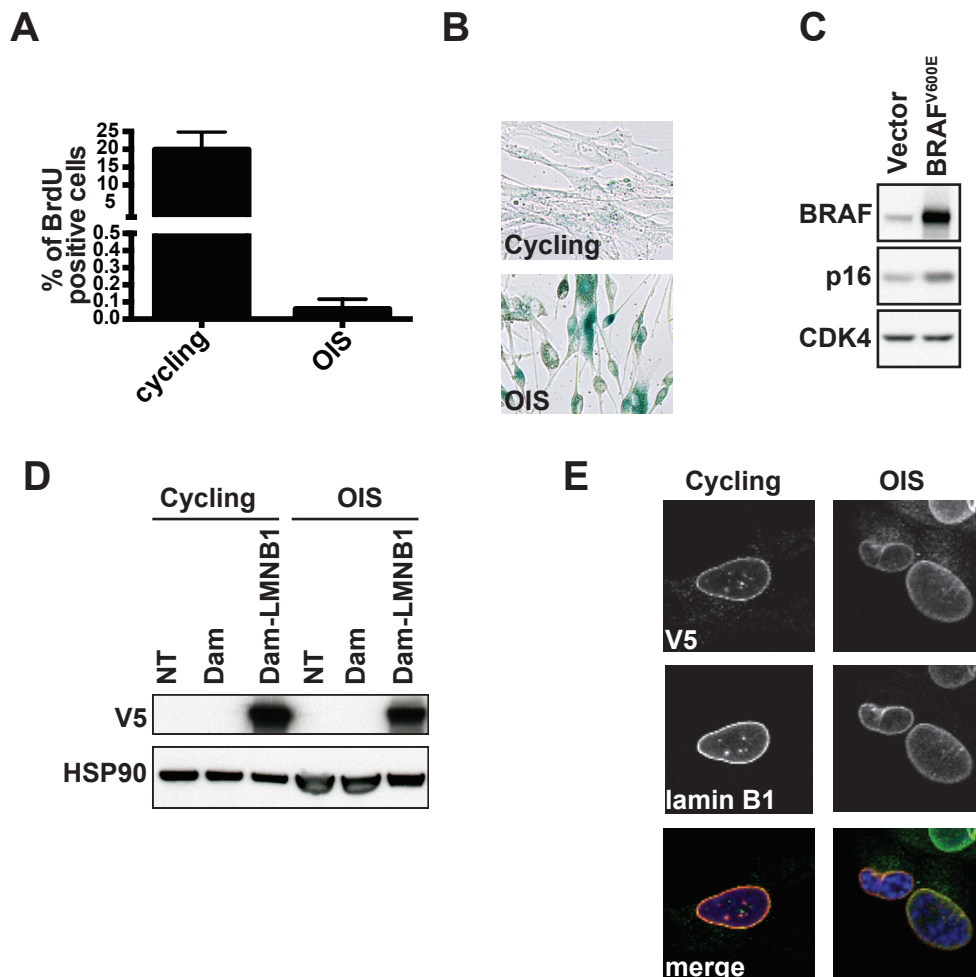

**Supplemental figure S1: Experimental setup and controls.** (A-C) Tig3ET fibroblasts transduced with BRAFV600E-encoding or empty vector encoding retroviruses were assessed at day 10 post-BRAFV600E transduction for several senescence markers: BrdU incorporation analysis (A), SA-galactosidase staining (B) or immunoblotting for BRAF and the tumor suppressor p16INK4a (C). (D) Immunoblotting analysis of V5 epitope-tagged expression of Dam-lamin B1 expression in Tig3ET cells transduced with the indicated constructs. (E) Immunostaining of cycling or OIS cells for endogenous lamin B1 and V5 epitope tag to detect V5-tagged Dam-laminB1 fusion protein.
