# Supplementary material for: Massive reshaping of genome–nuclear lamina interactions during oncogene-induced senescence
Source: PubMed Central journal article supplement — Genome Res. 2017 Oct;27(10):1634–44. doi: 10.1101/gr.225763.117 (PMC5630027; doi:10.1101/gr.225763.117), 2017-10
Supplement: supp_gr.225763.117_Supplemental_Fig_S2.pdf [file supp_gr.225763.117_Supplemental_Fig_S2.pdf]

LMNB1 interaction (log2)

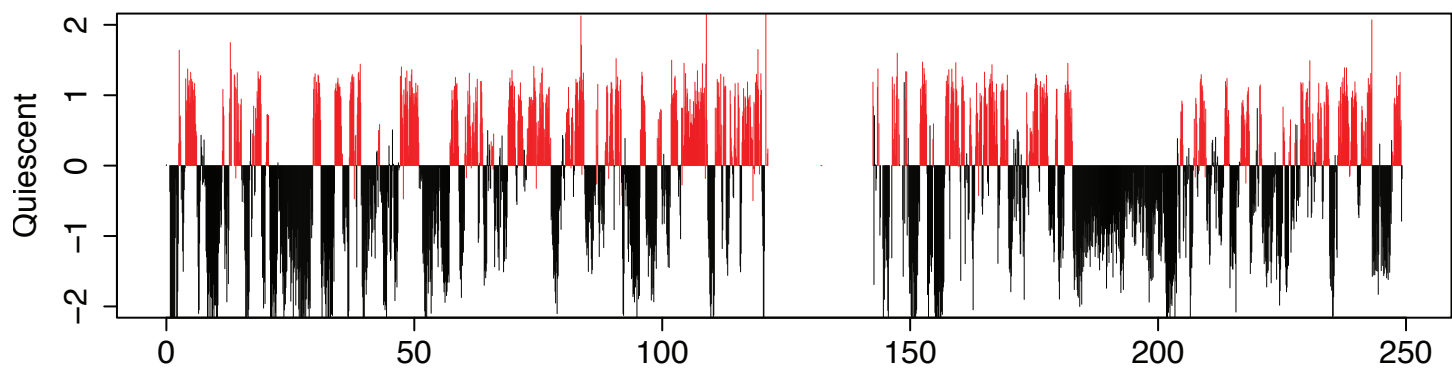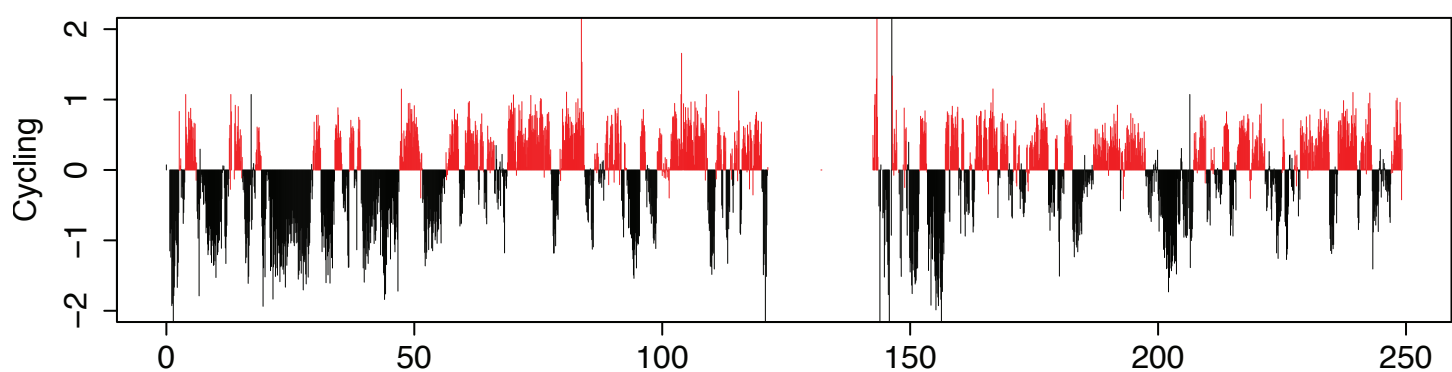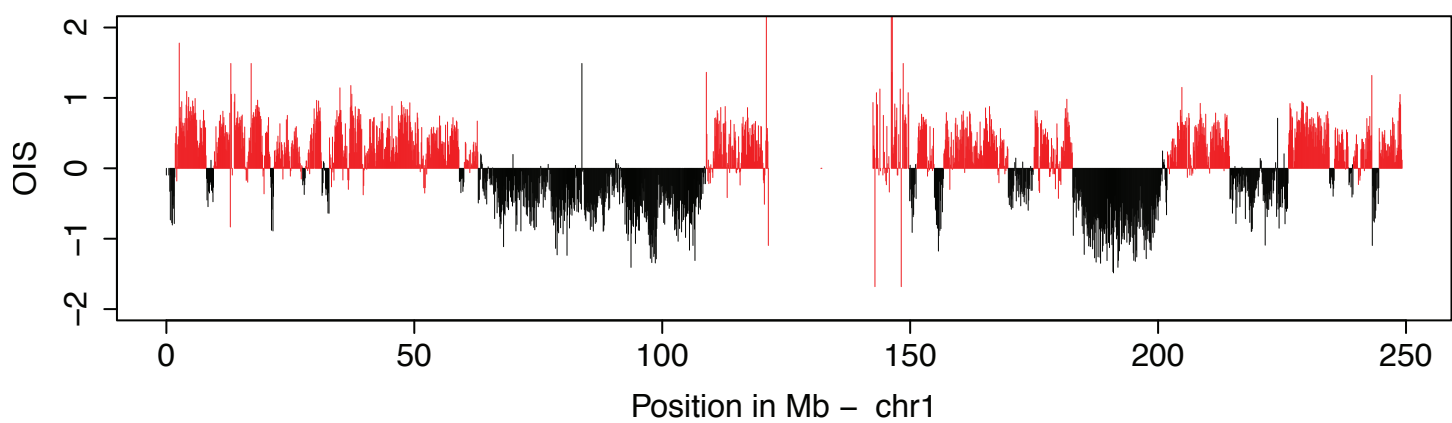

Change LMNB1 Interaction

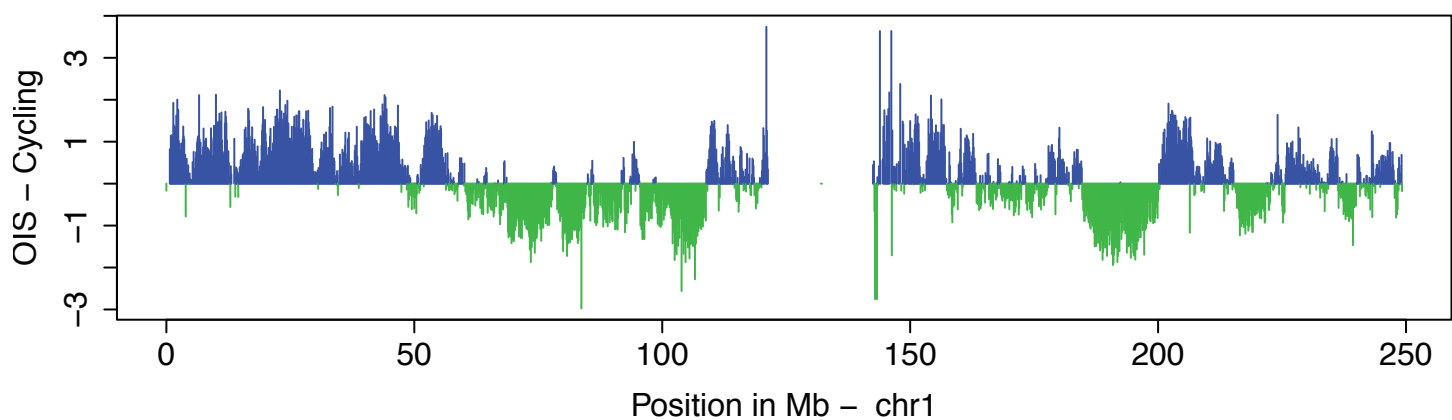

### LMNB1 interaction (log2)

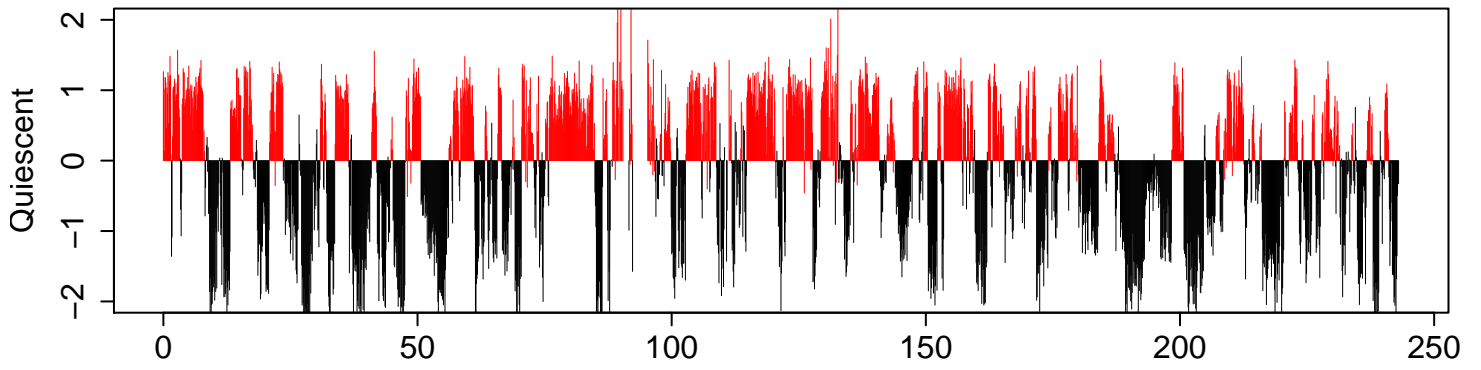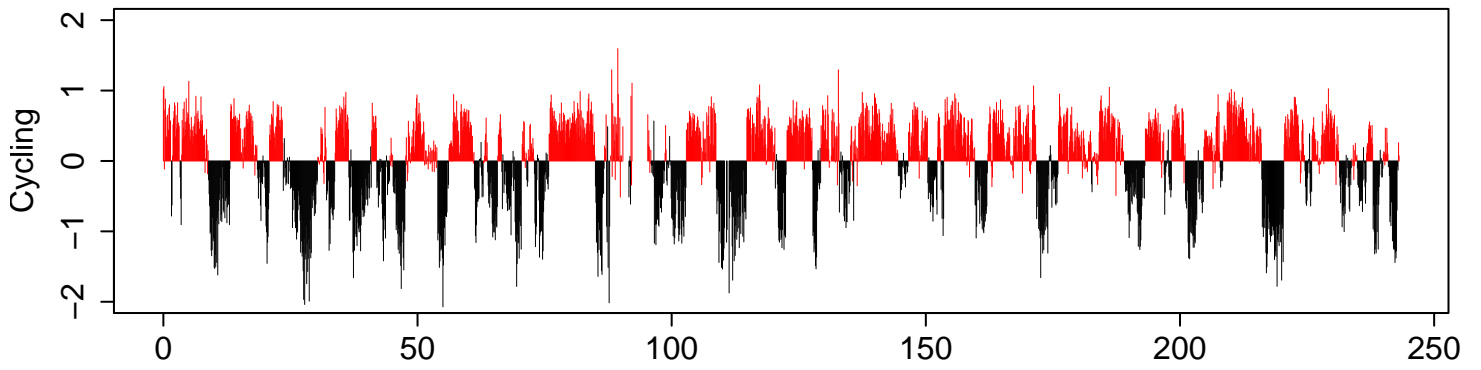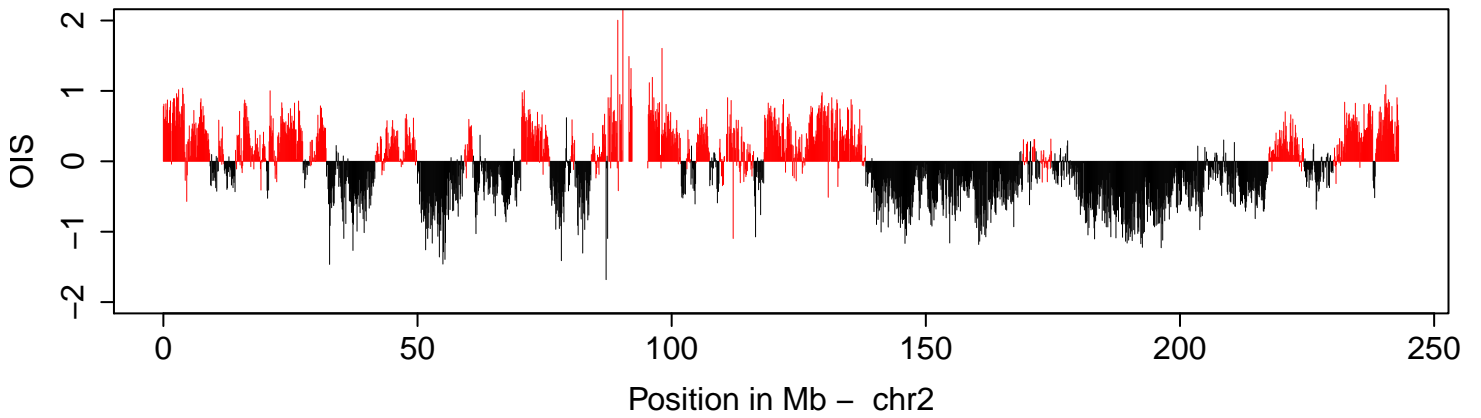

### Change LMNB1 Interaction

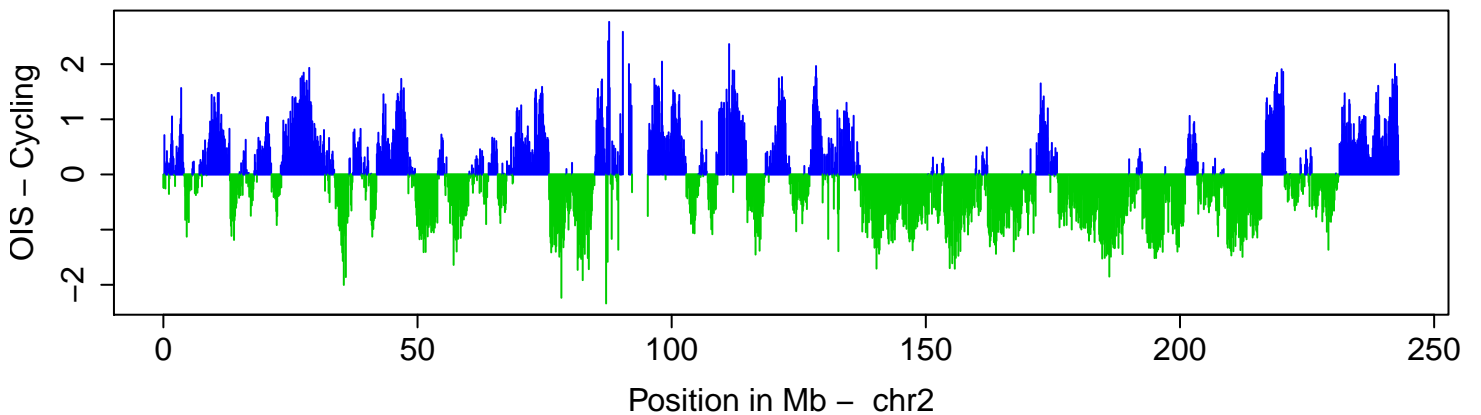

### LMNB1 interaction (log2)

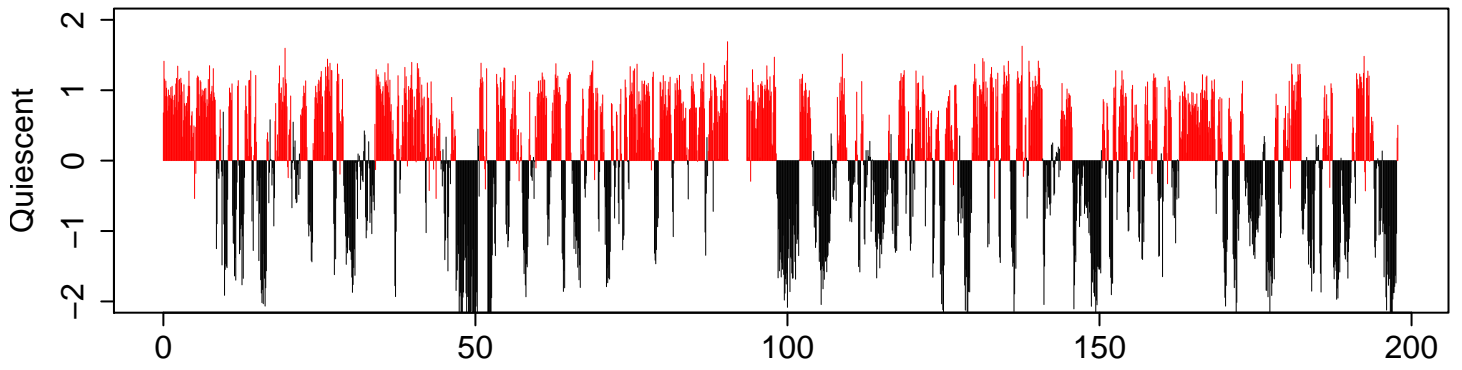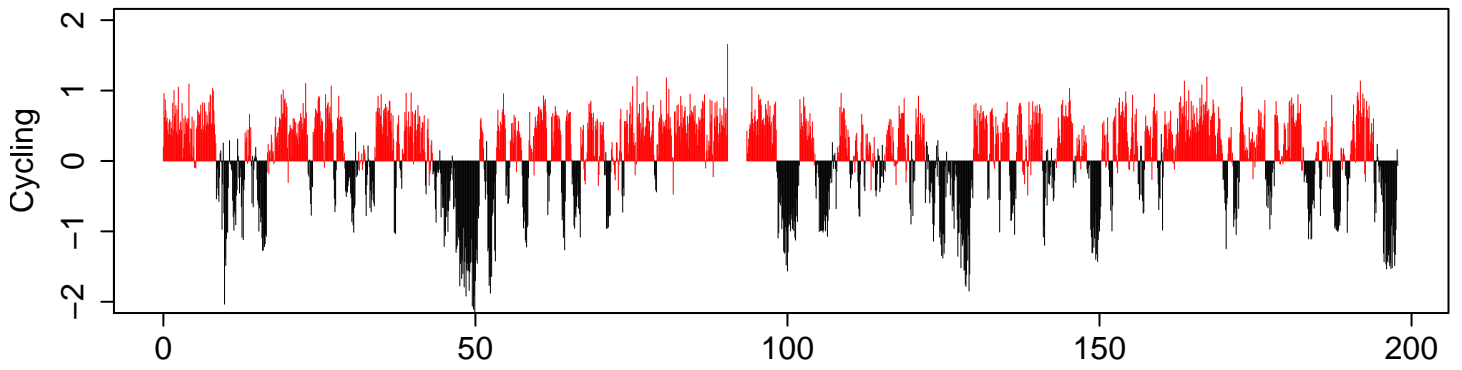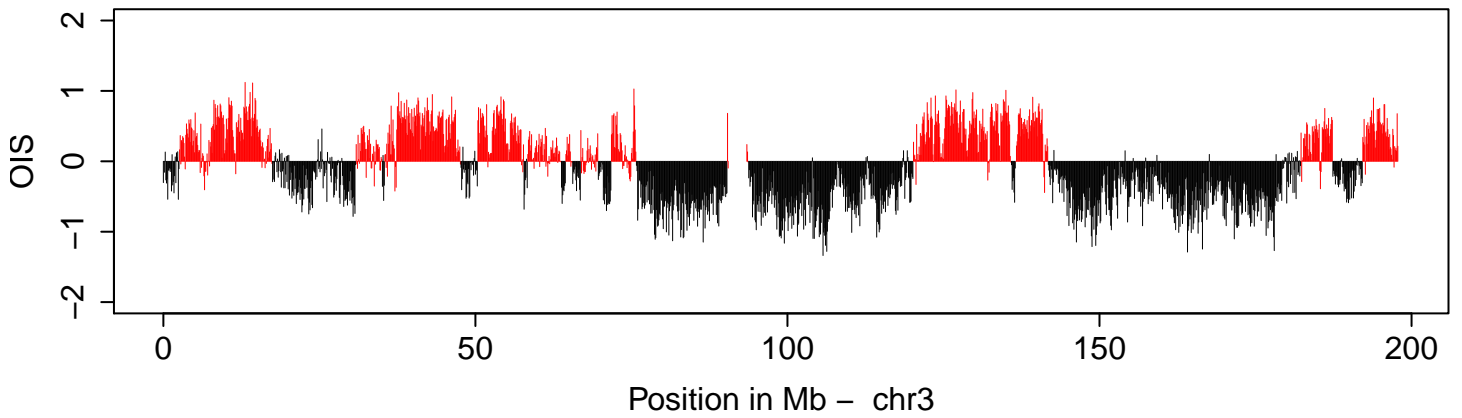

### Change LMNB1 Interaction

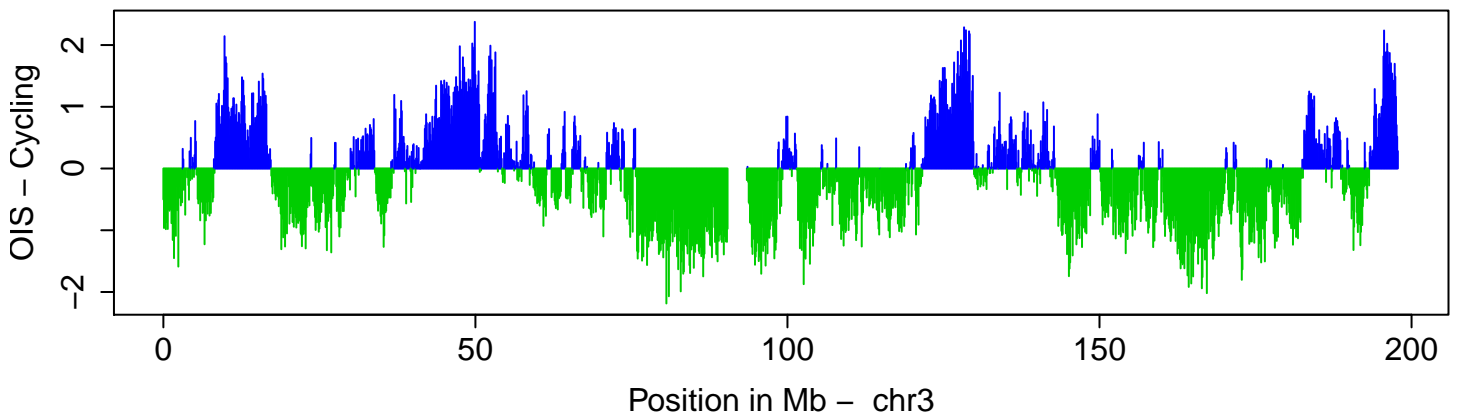

### LMNB1 interaction (log2)

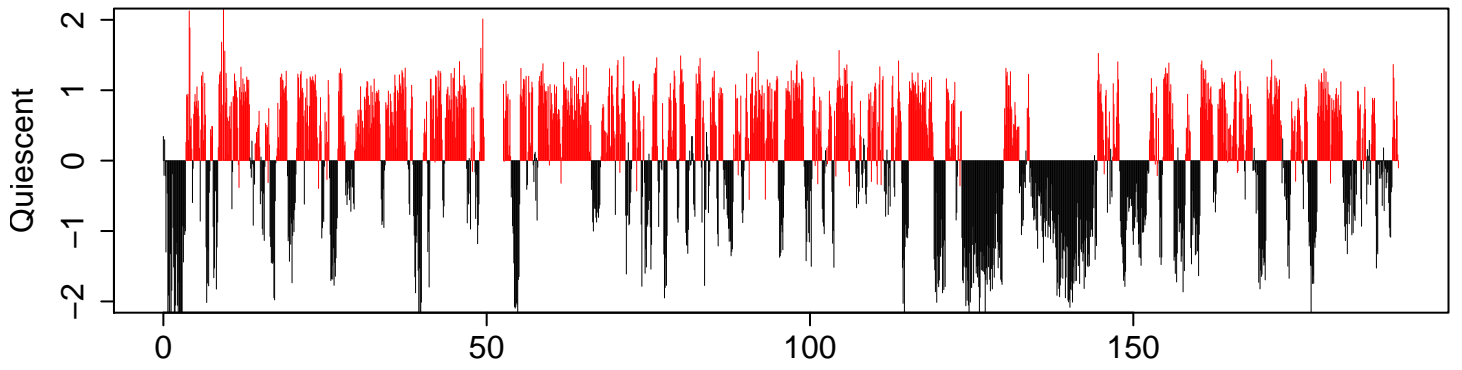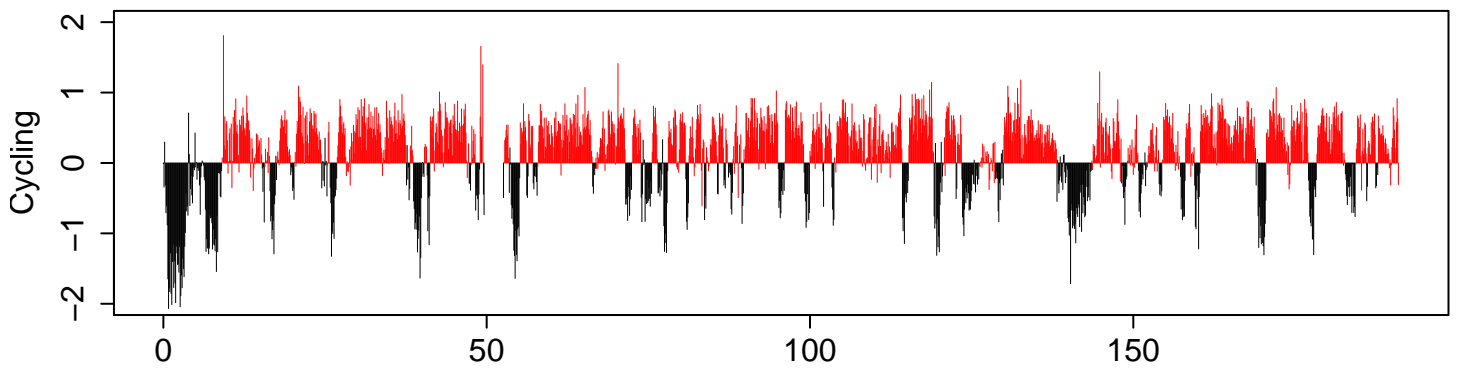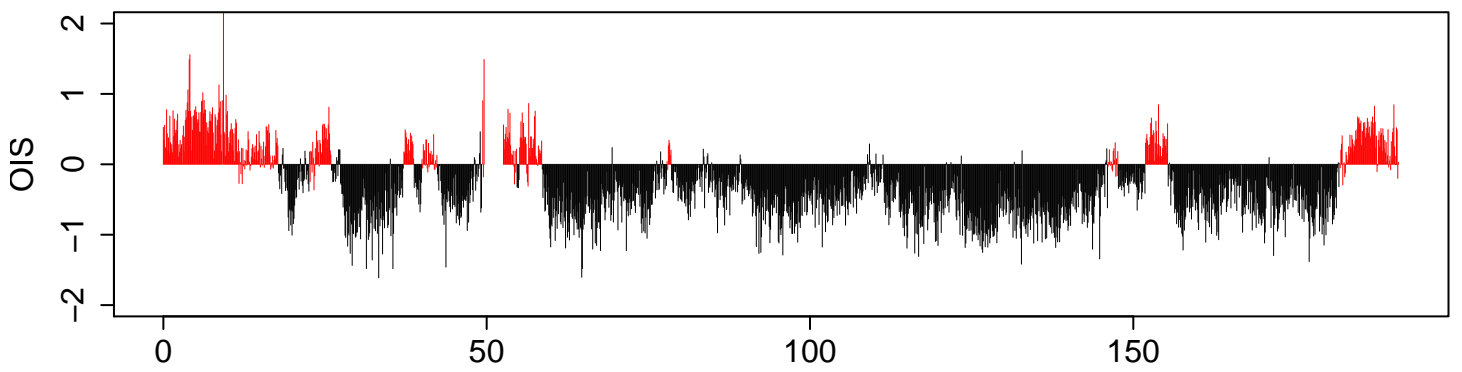

Position in Mb – chr4

### Change LMNB1 Interaction

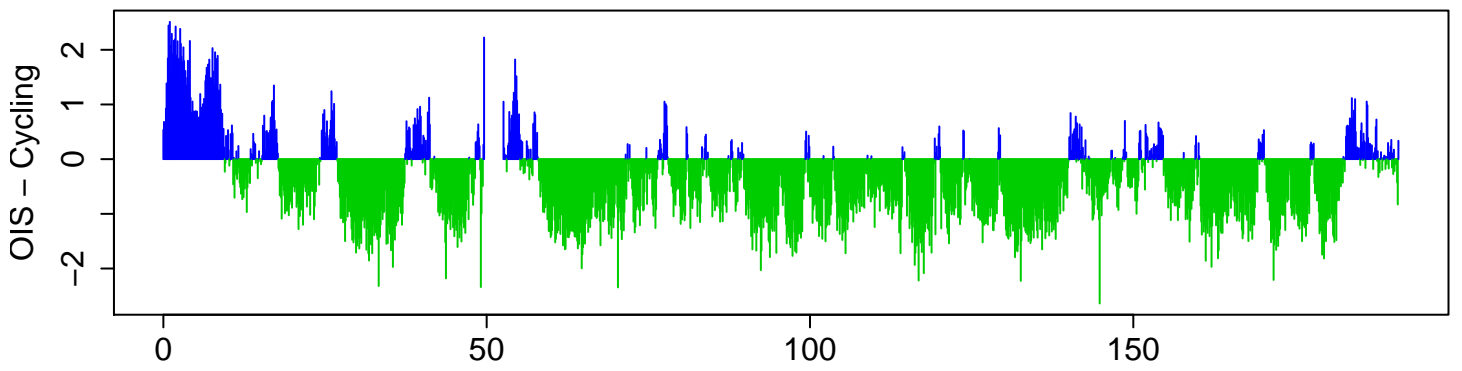

Position in Mb – chr4

### LMNB1 interaction (log2)

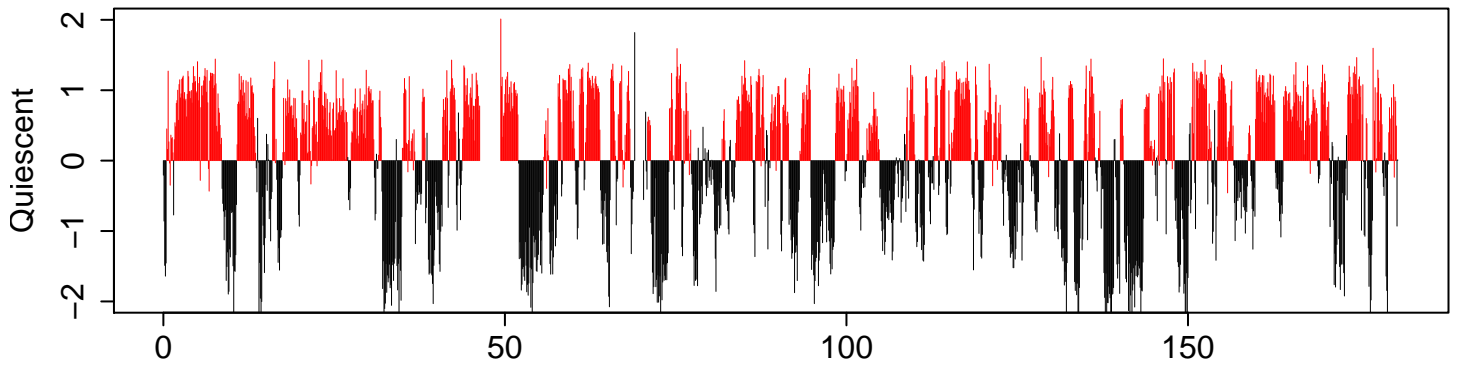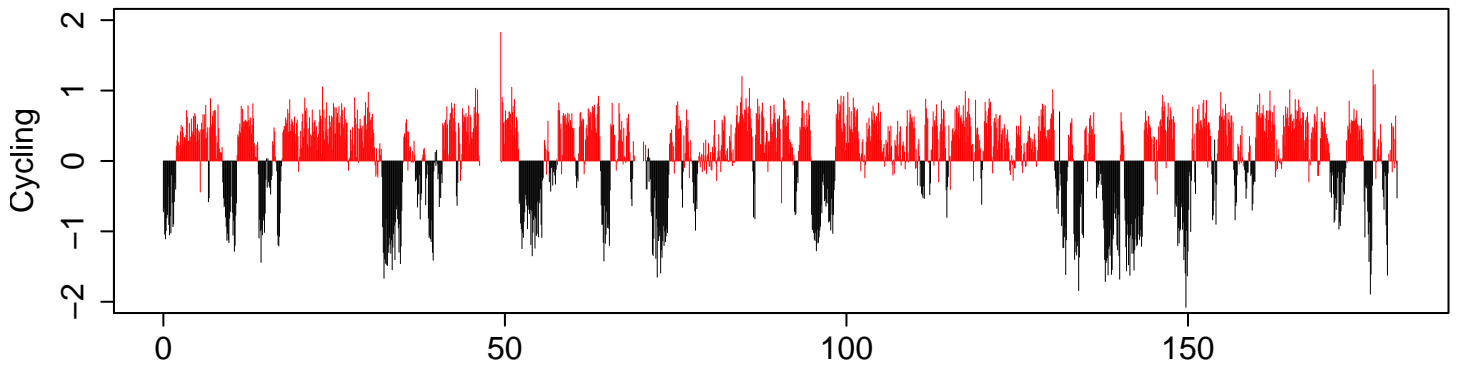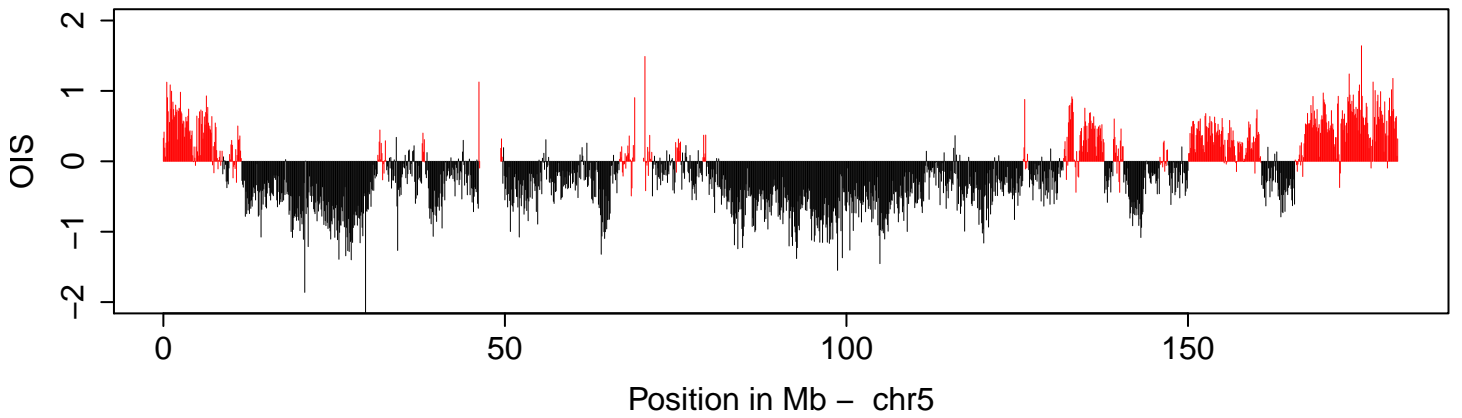

### Change LMNB1 Interaction

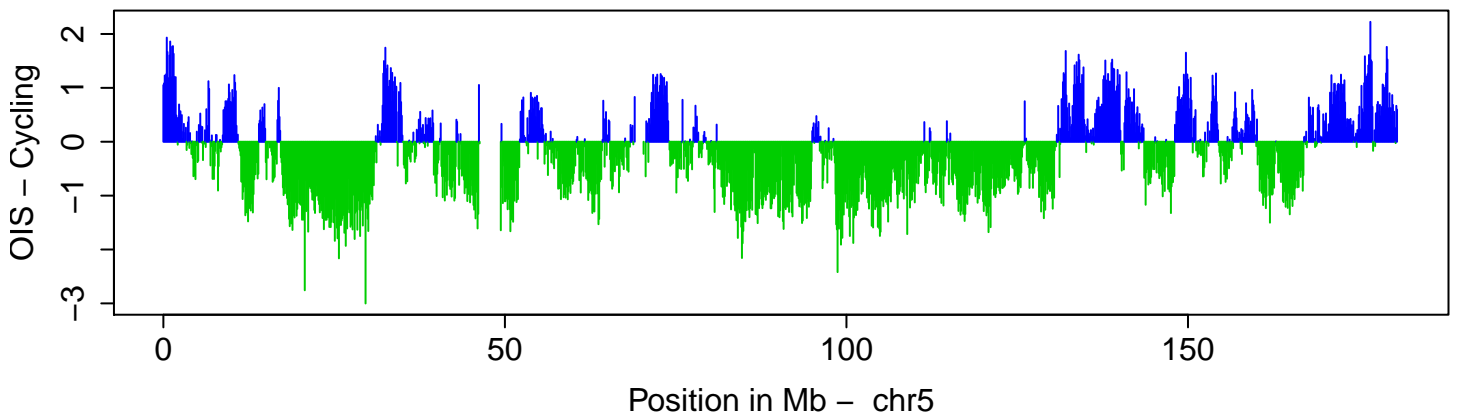

### LMNB1 interaction (log2)

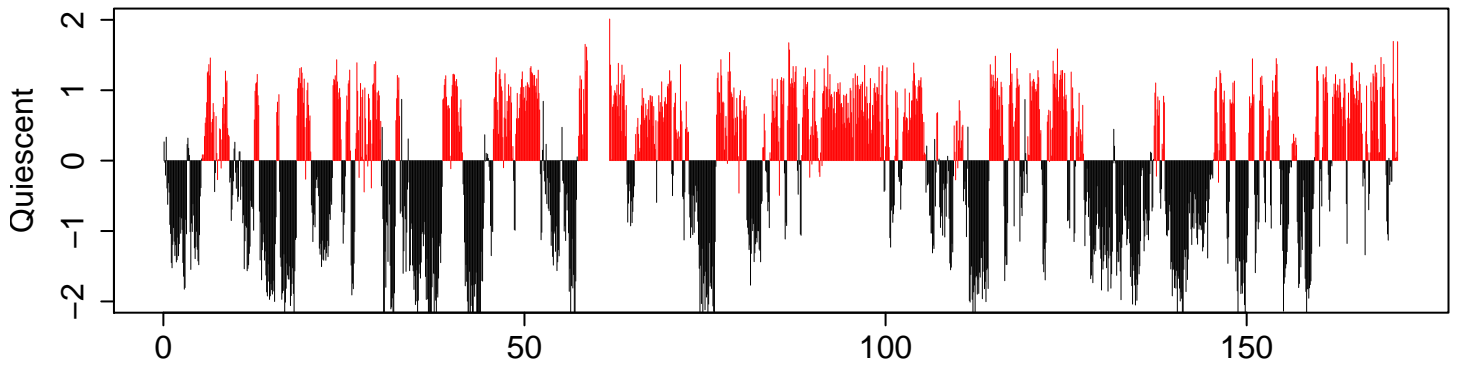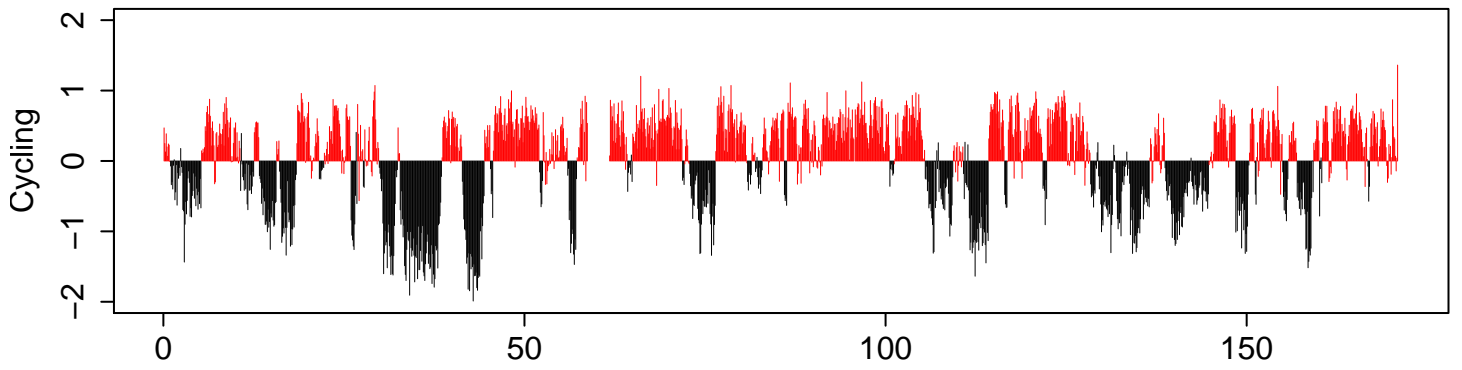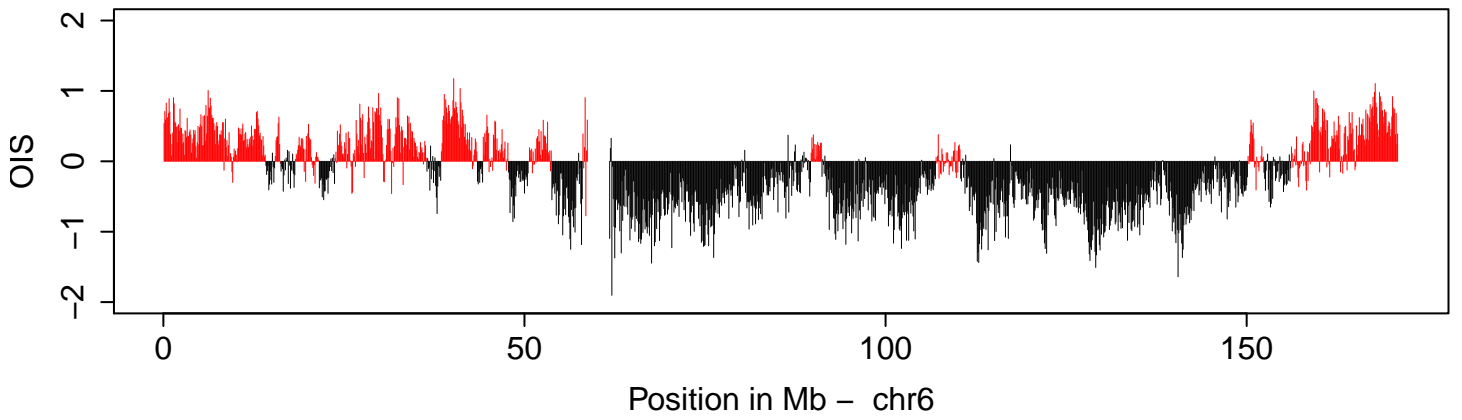

### Change LMNB1 Interaction

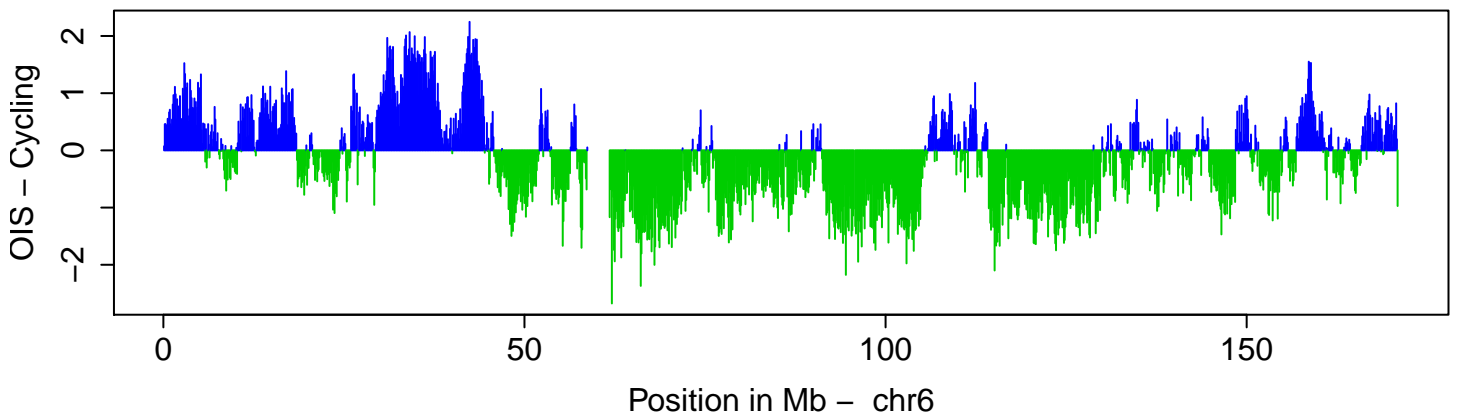

### LMNB1 interaction (log2)

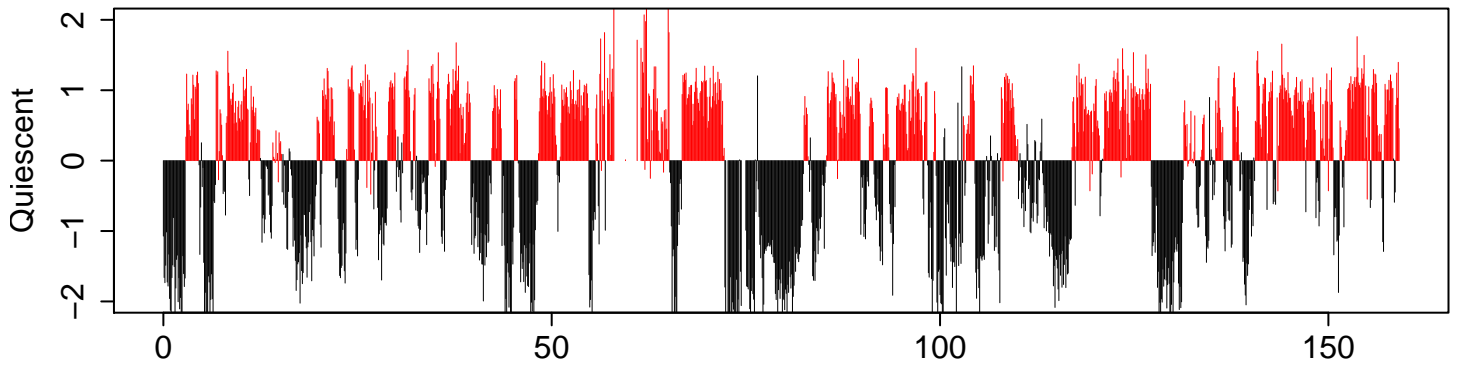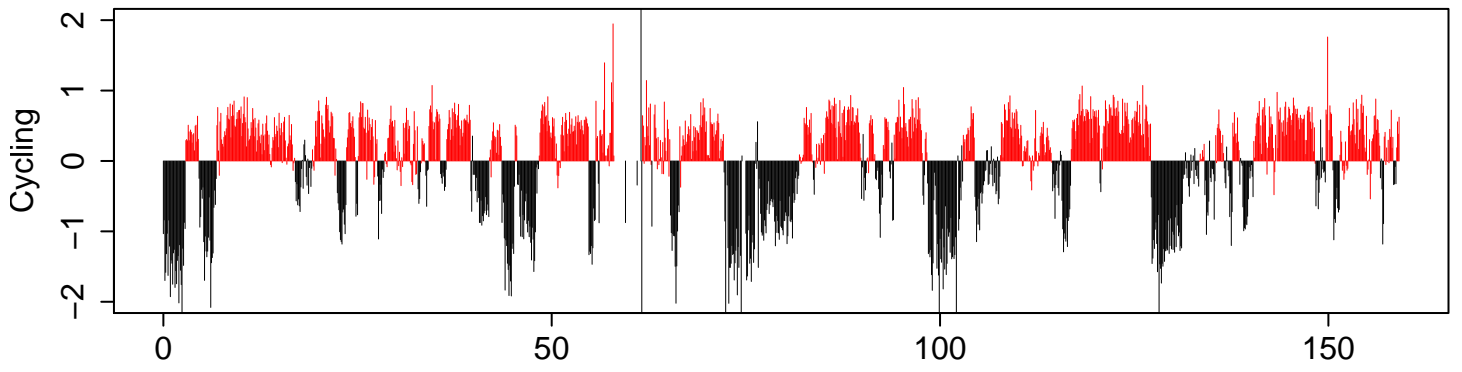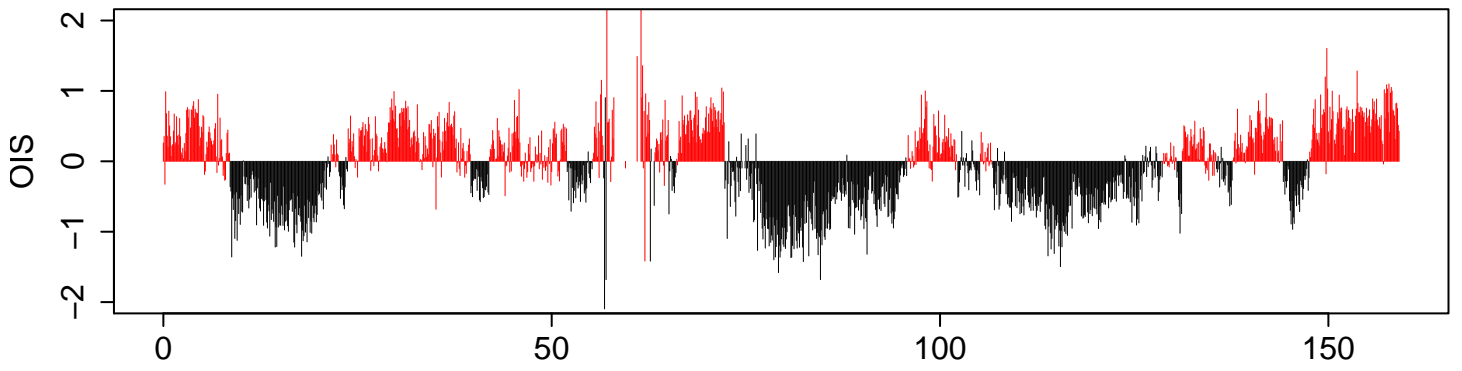

### Change LMNB1 Interaction

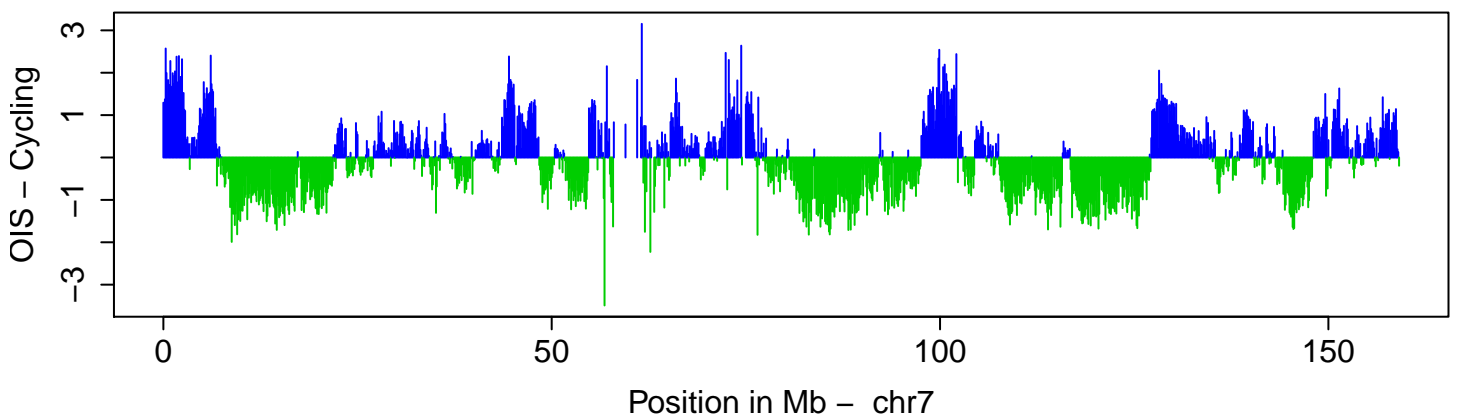

### LMNB1 interaction (log2)

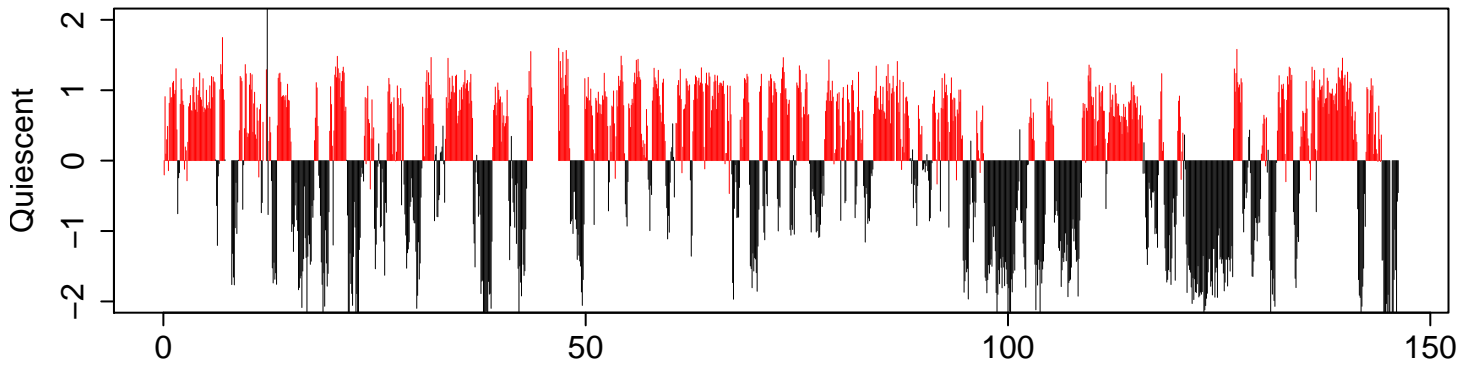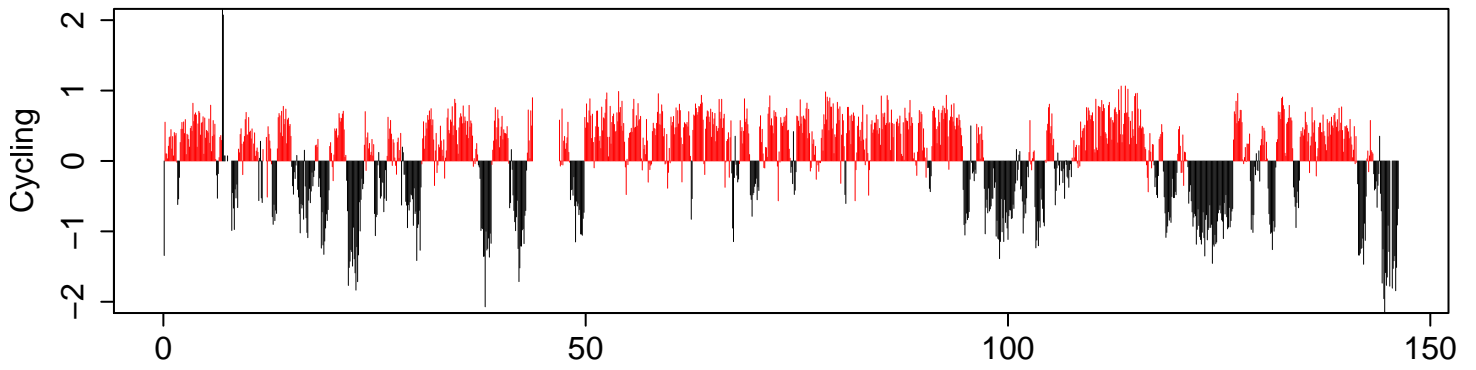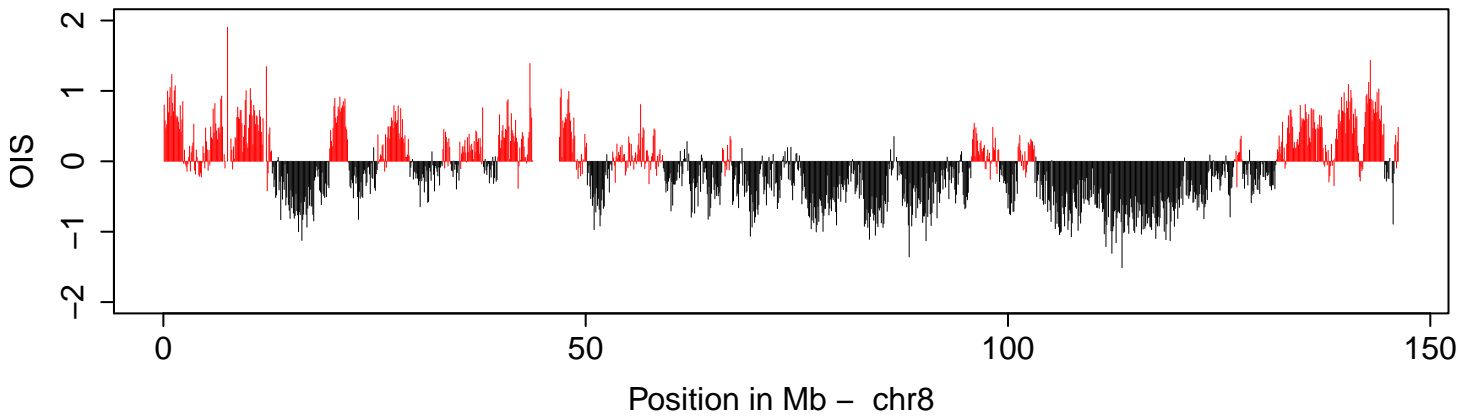

### Change LMNB1 Interaction

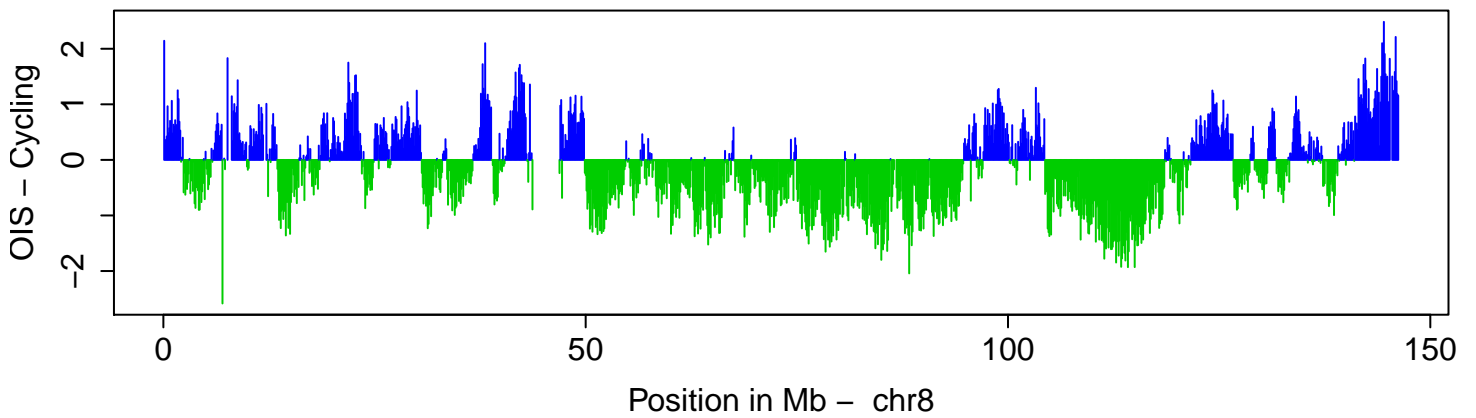



### LMNB1 interaction (log2)

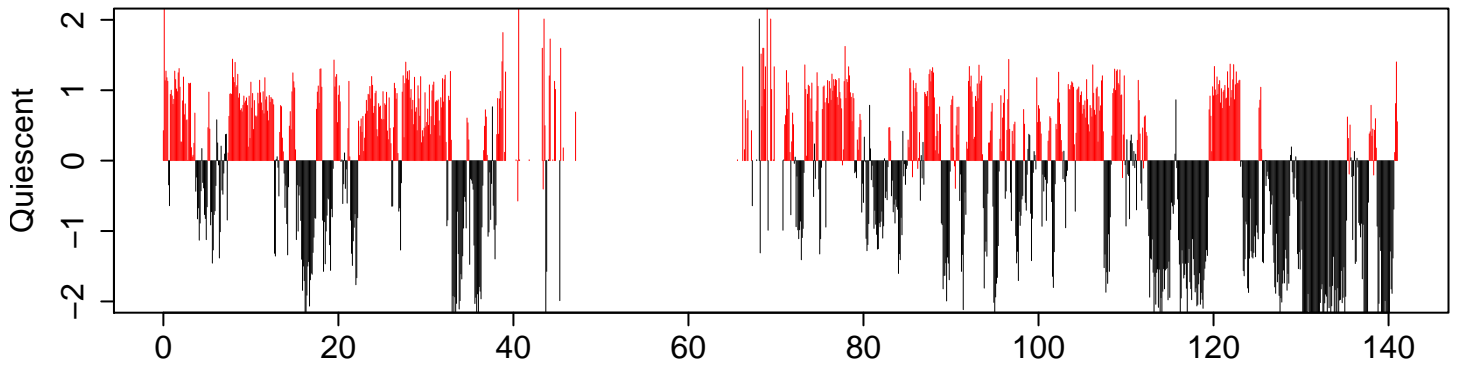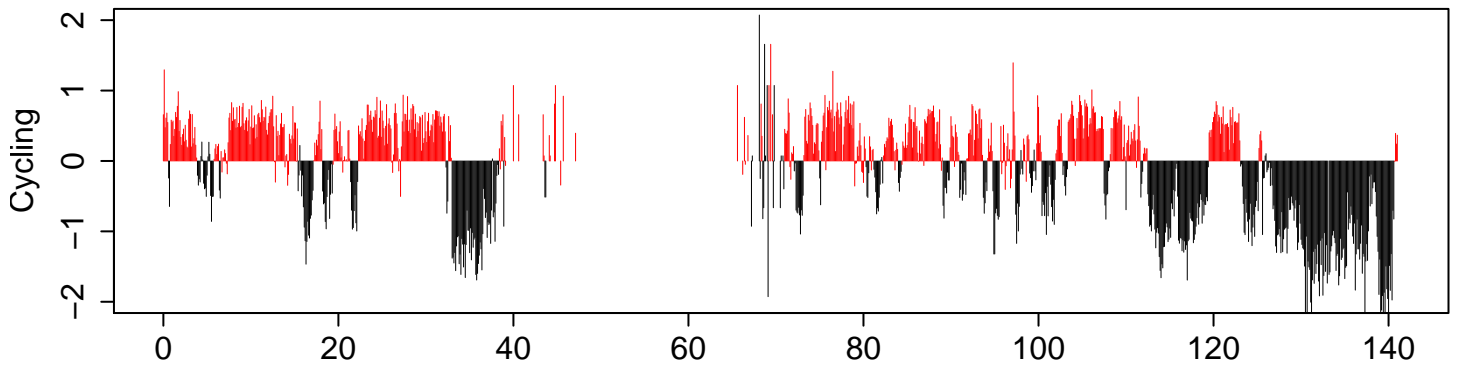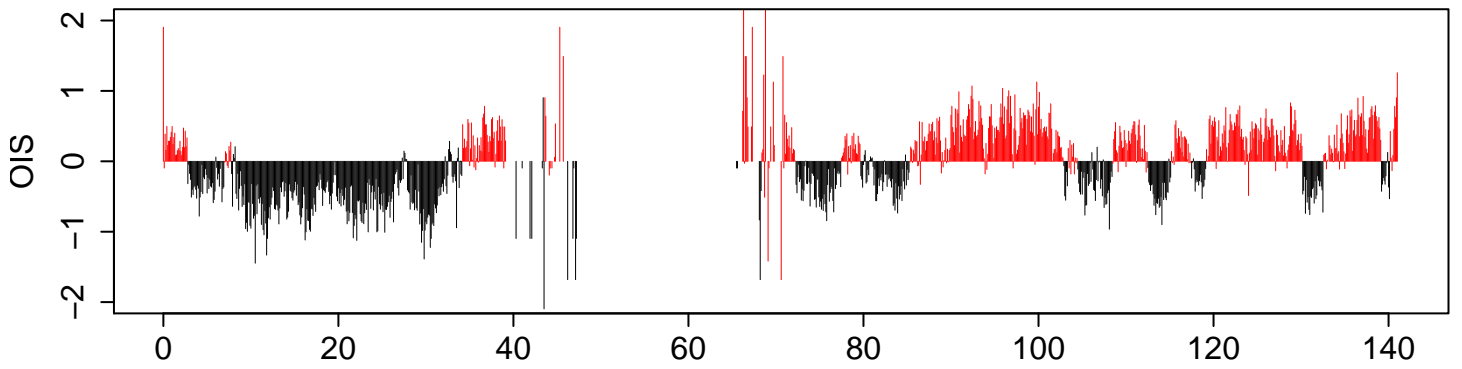

Position in Mb - chr9

### Change LMNB1 Interaction

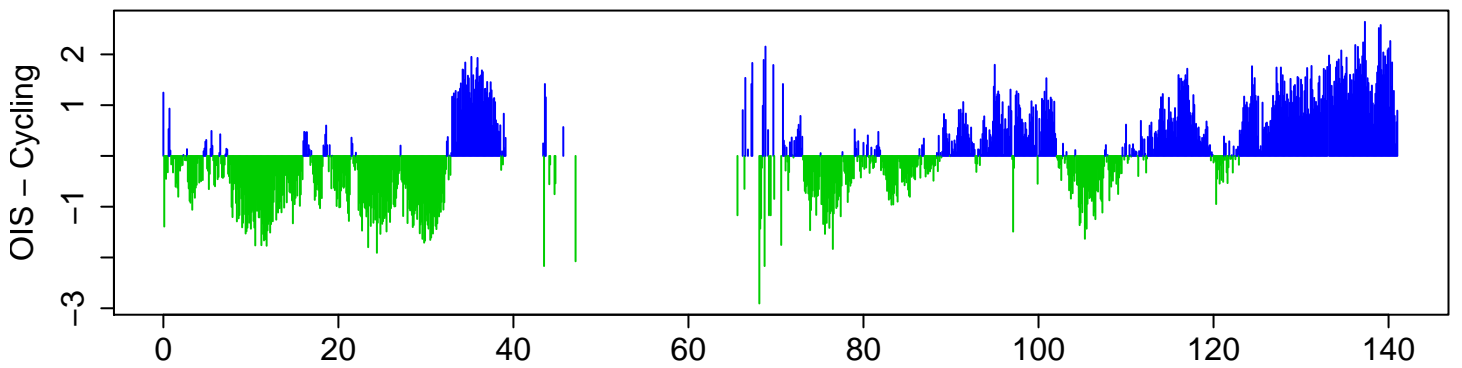

Position in Mb - chr9

### LMNB1 interaction (log2)

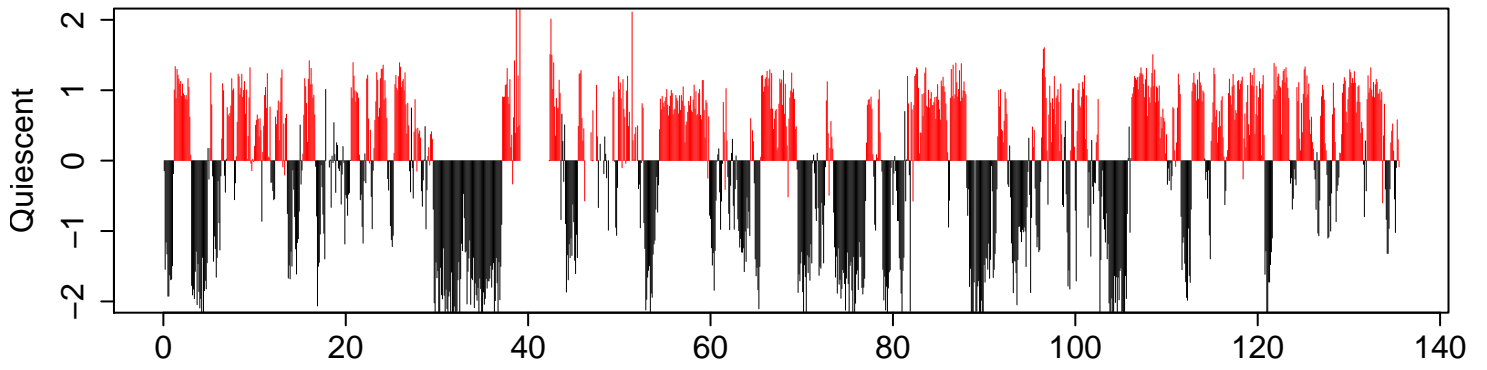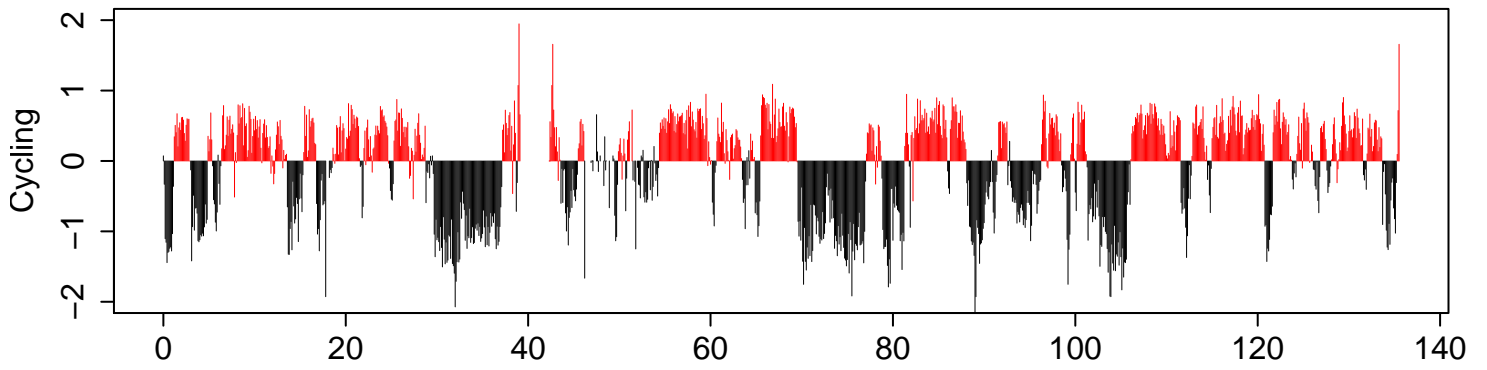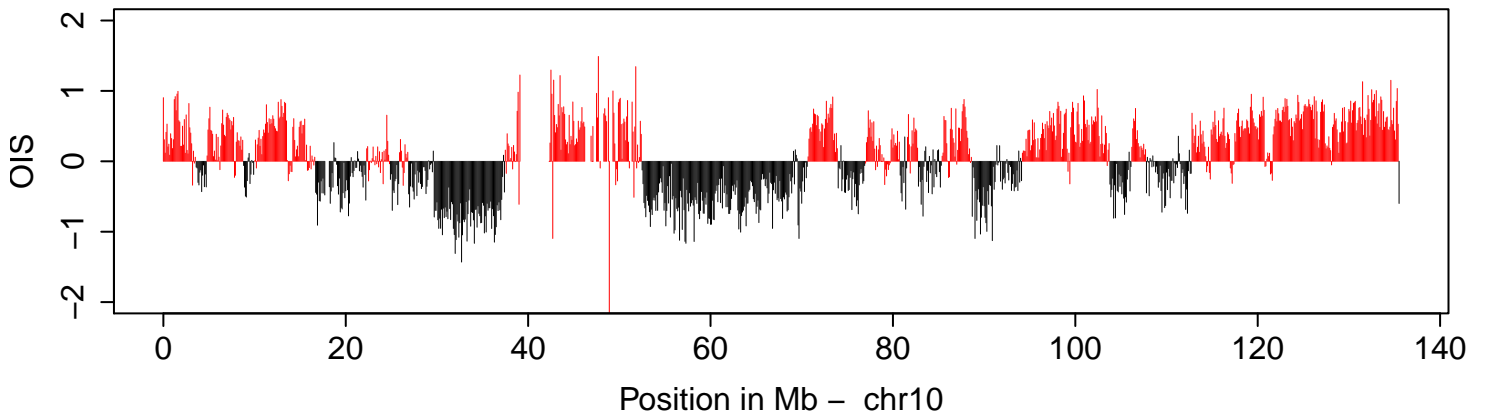

### Change LMNB1 Interaction

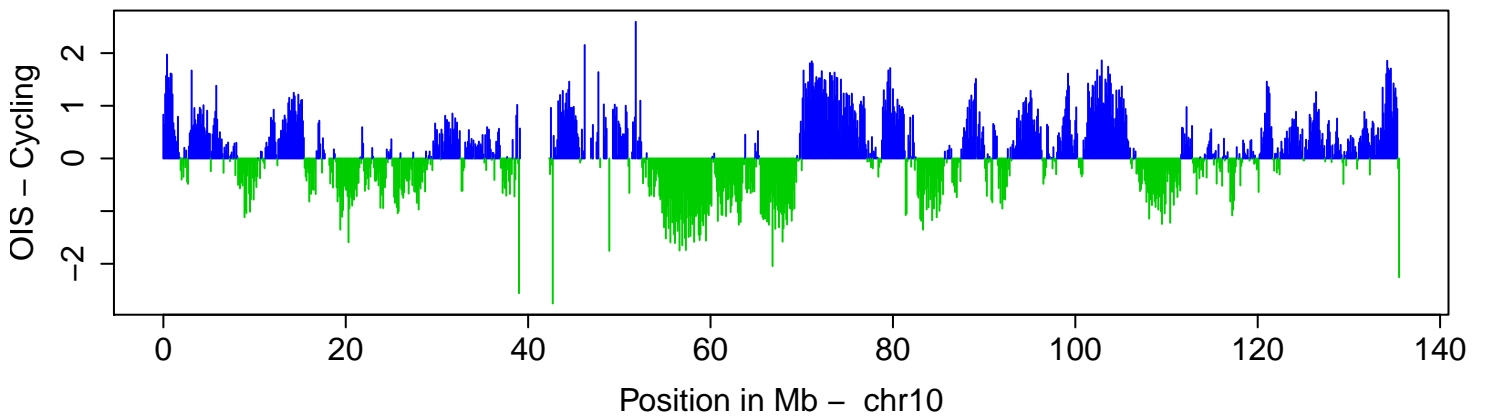

### LMNB1 interaction (log2)

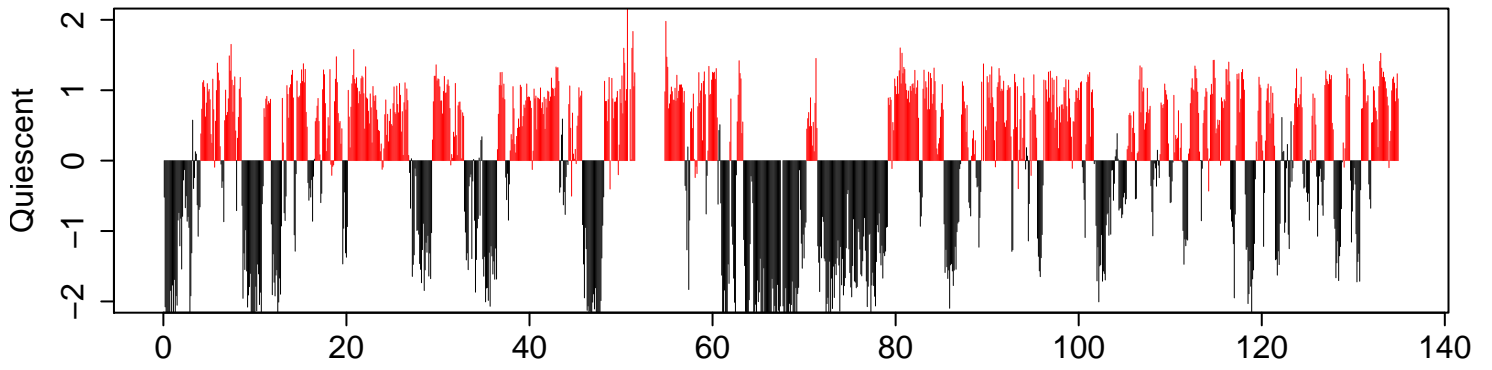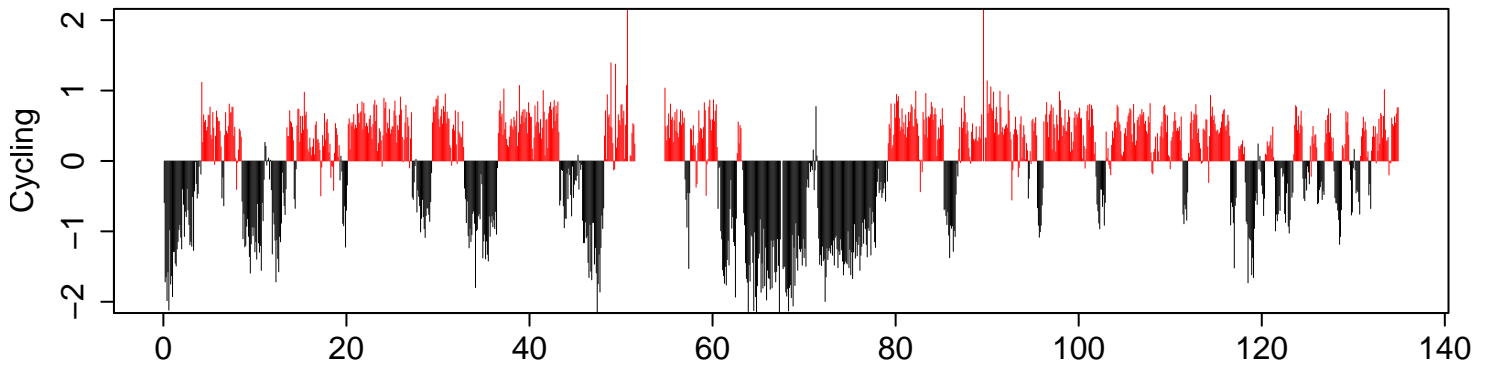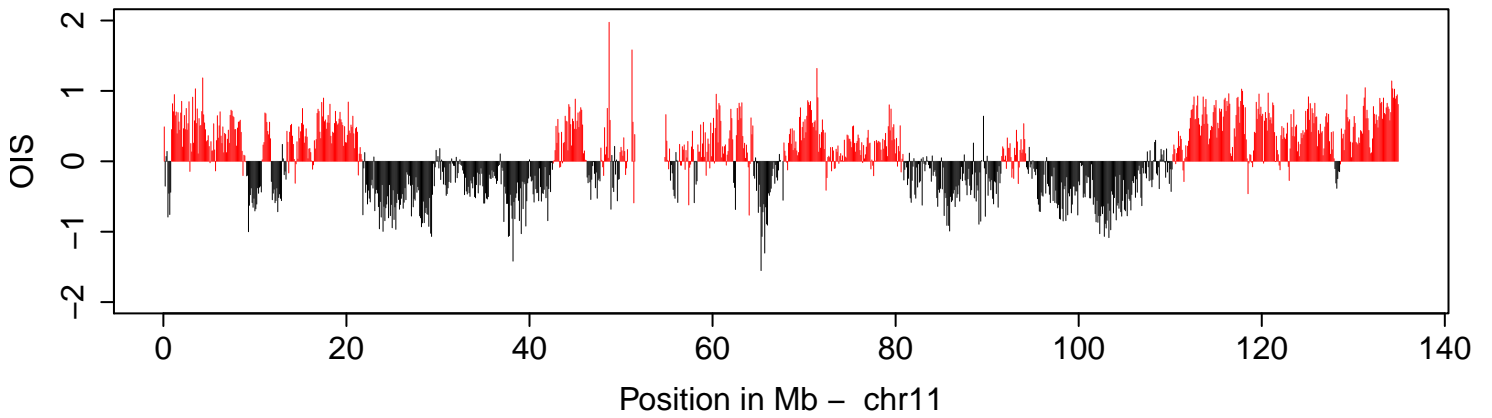

### Change LMNB1 Interaction

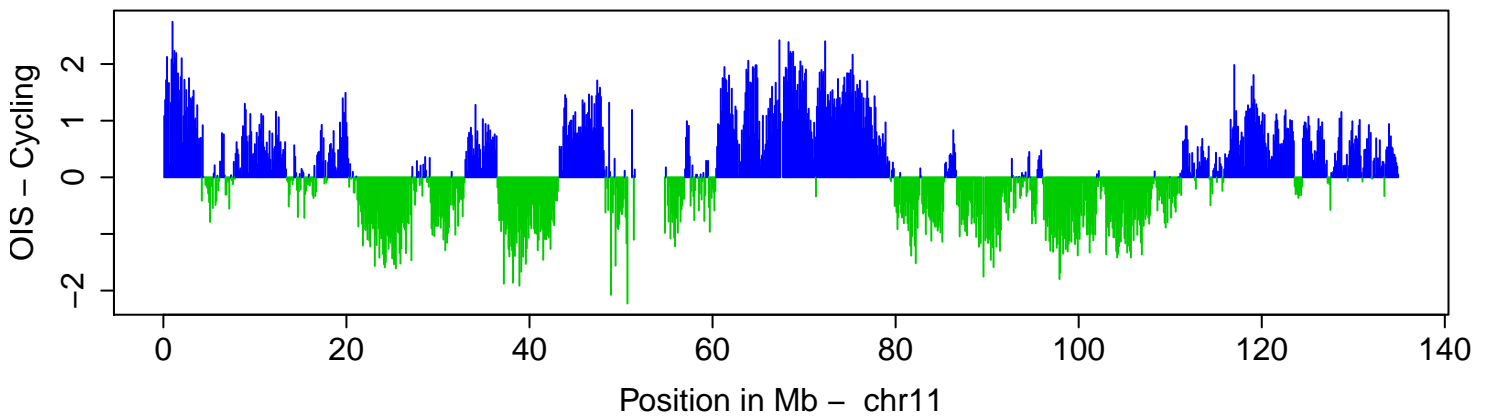

### LMNB1 interaction (log2)

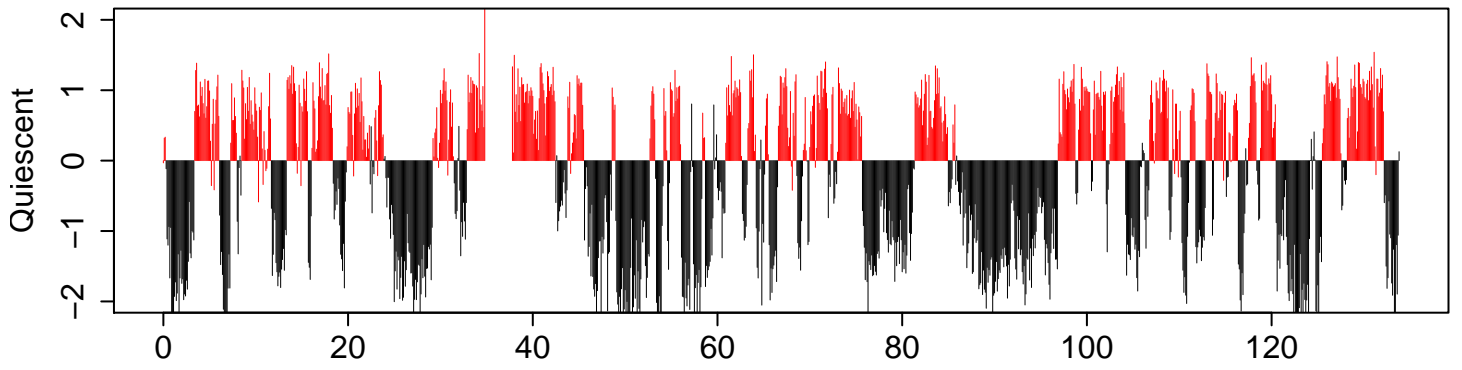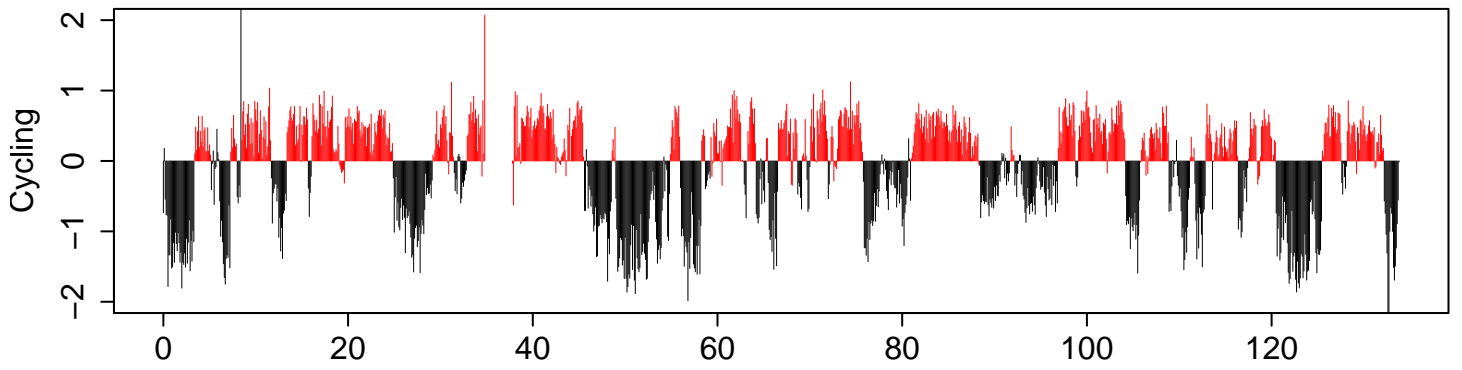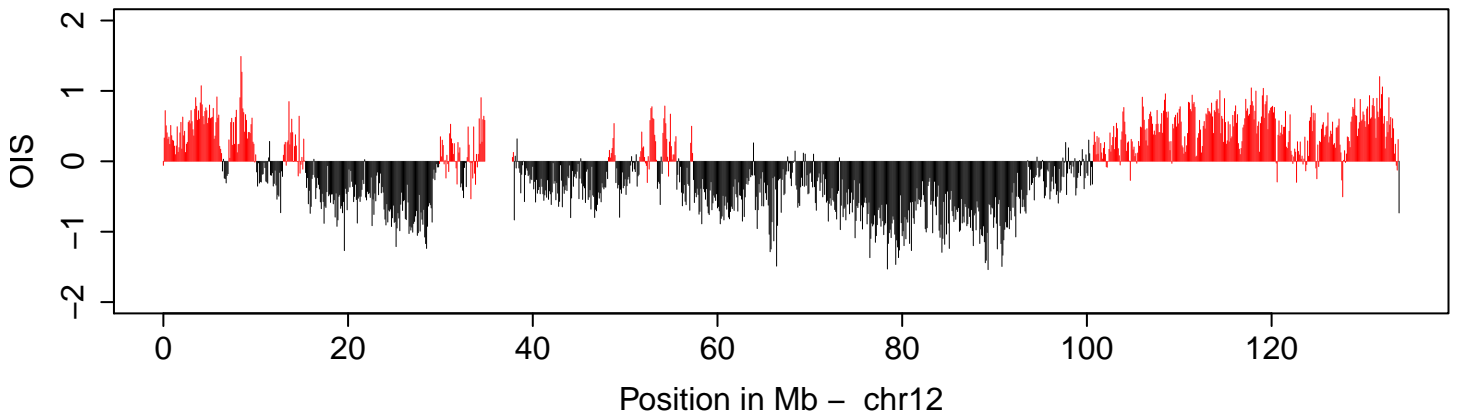

### Change LMNB1 Interaction

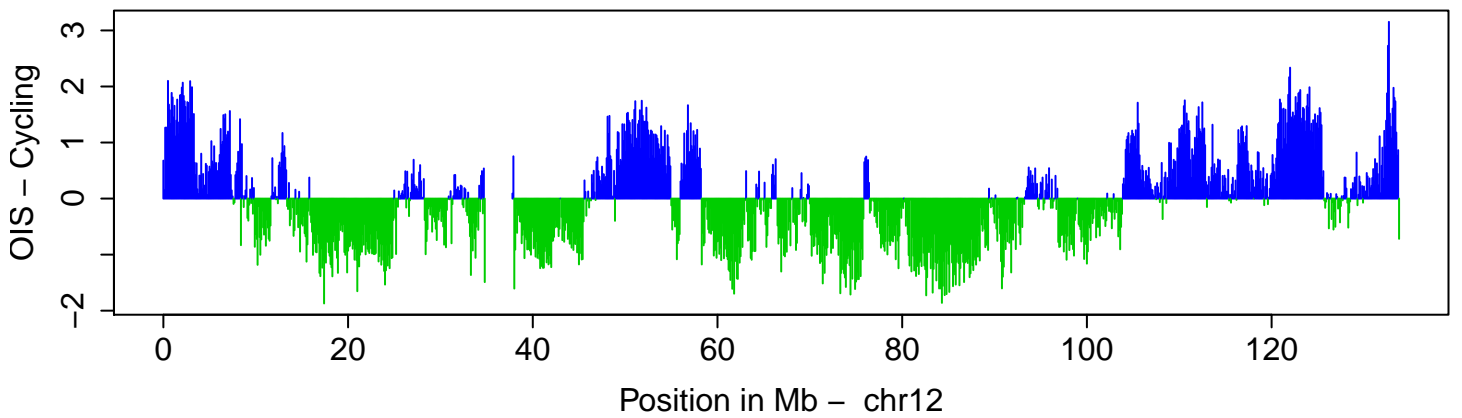

### LMNB1 interaction (log2)

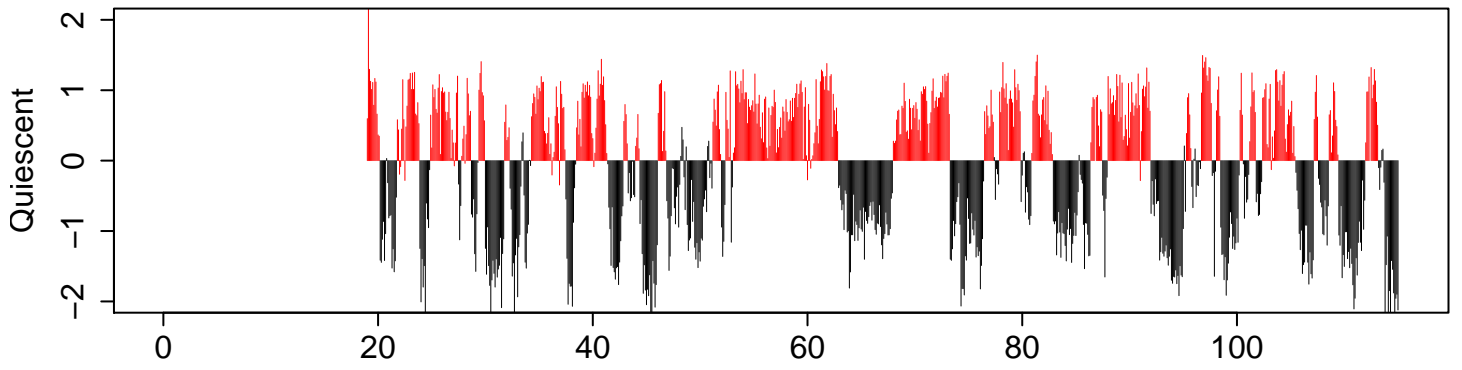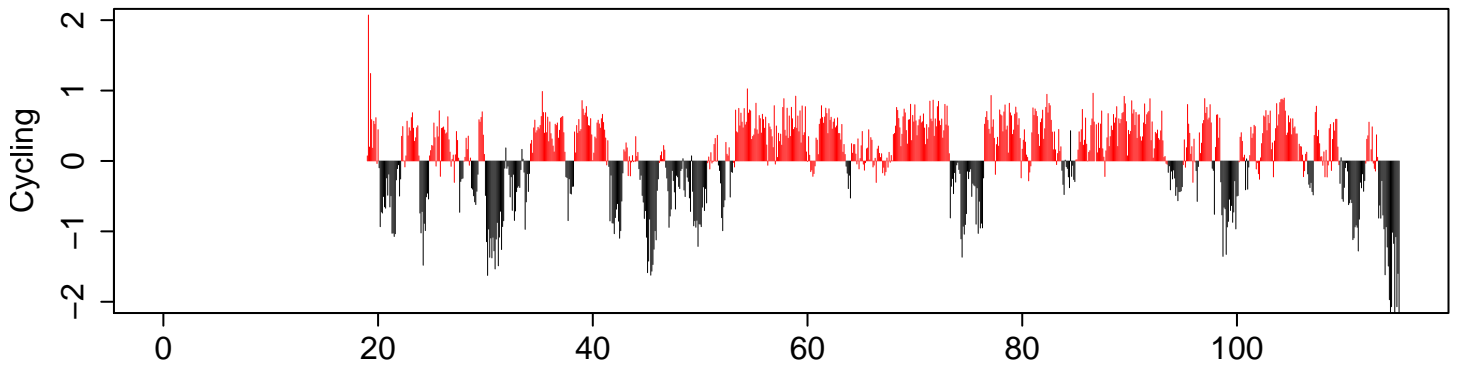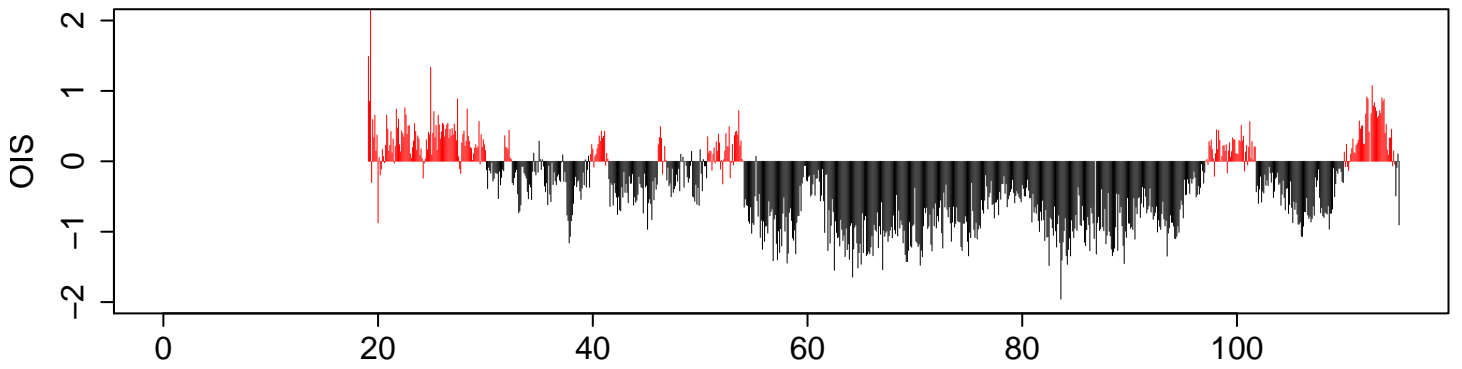

Position in Mb – chr13

### Change LMNB1 Interaction

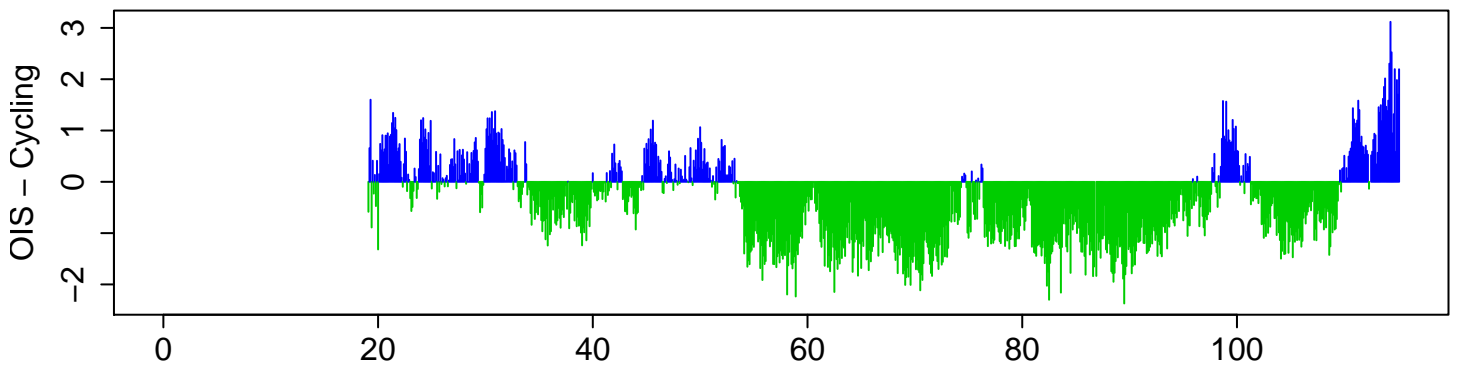

Position in Mb – chr13

### LMNB1 interaction (log2)

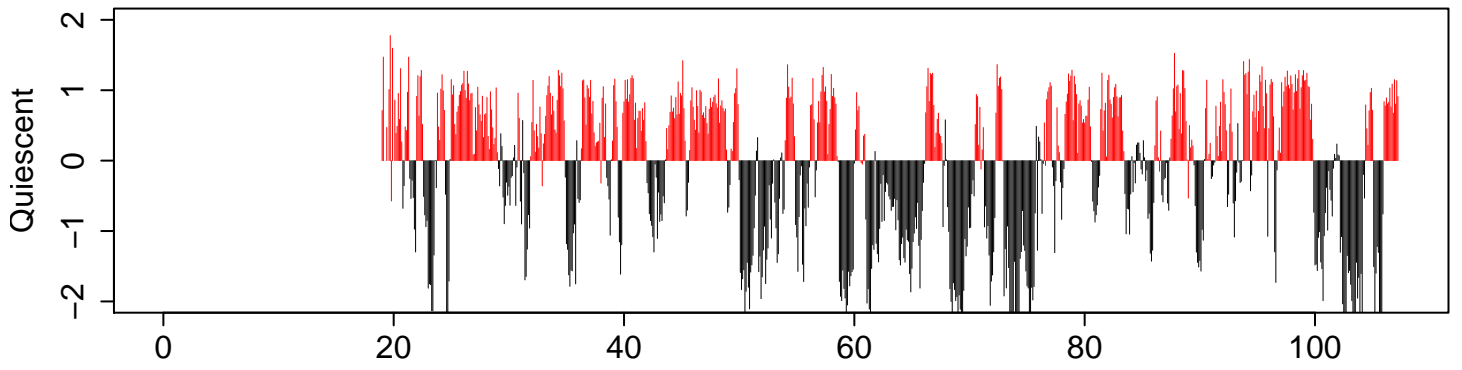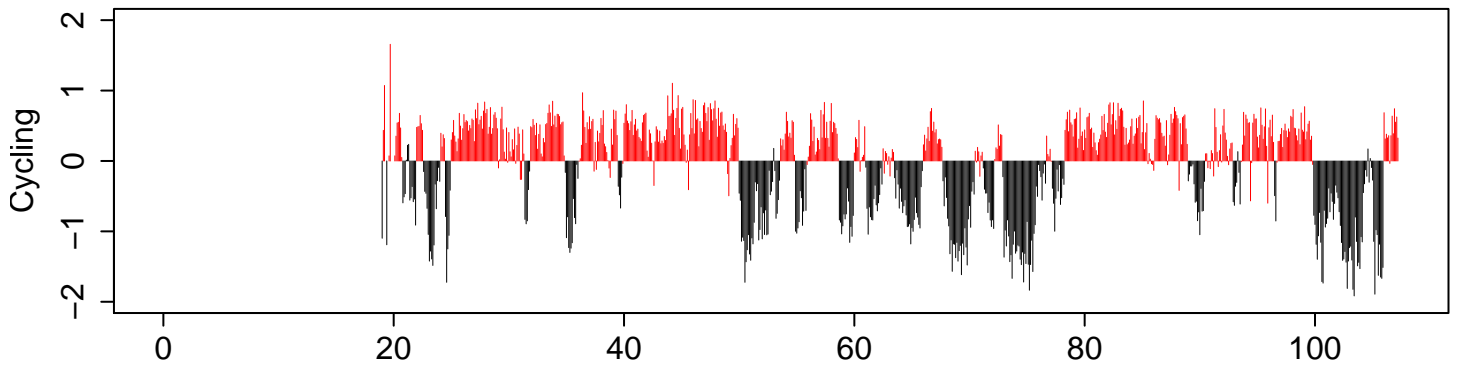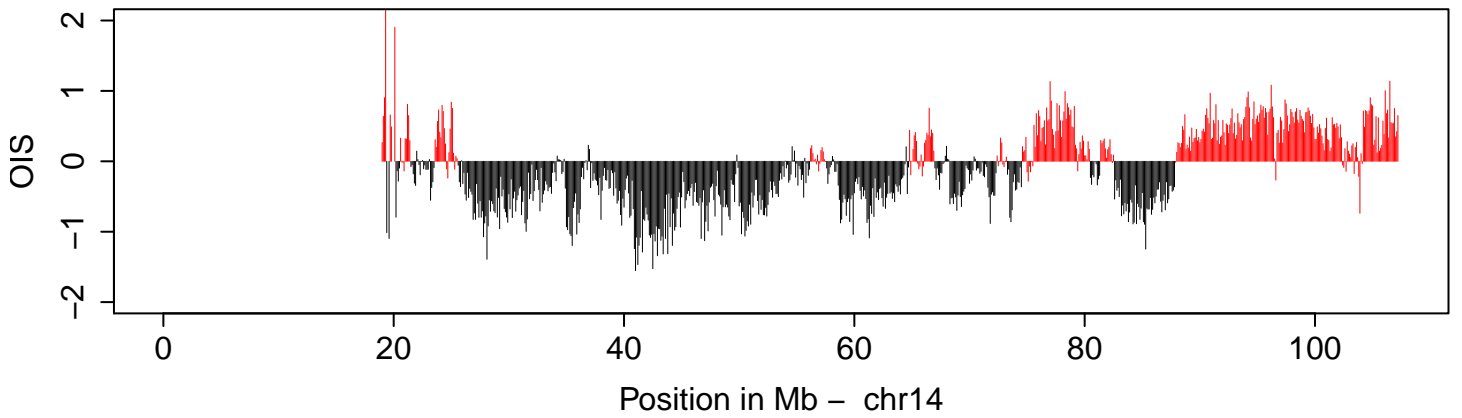

### Change LMNB1 Interaction

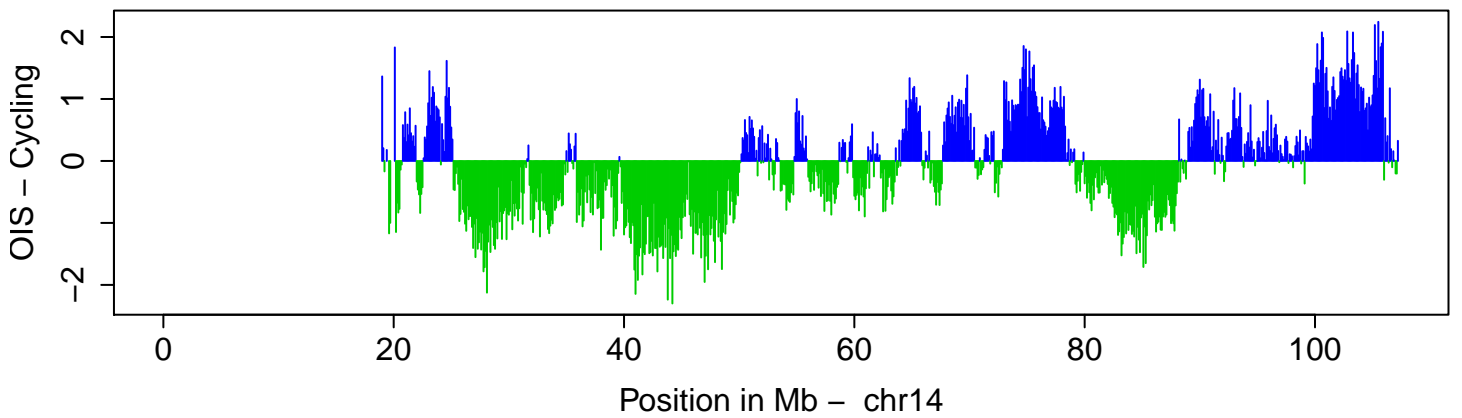

### LMNB1 interaction (log2)

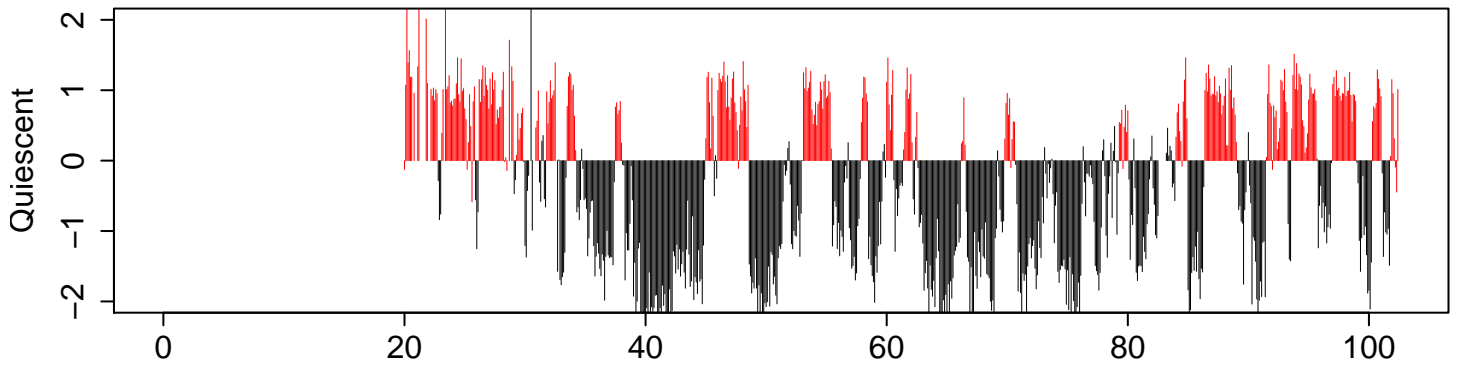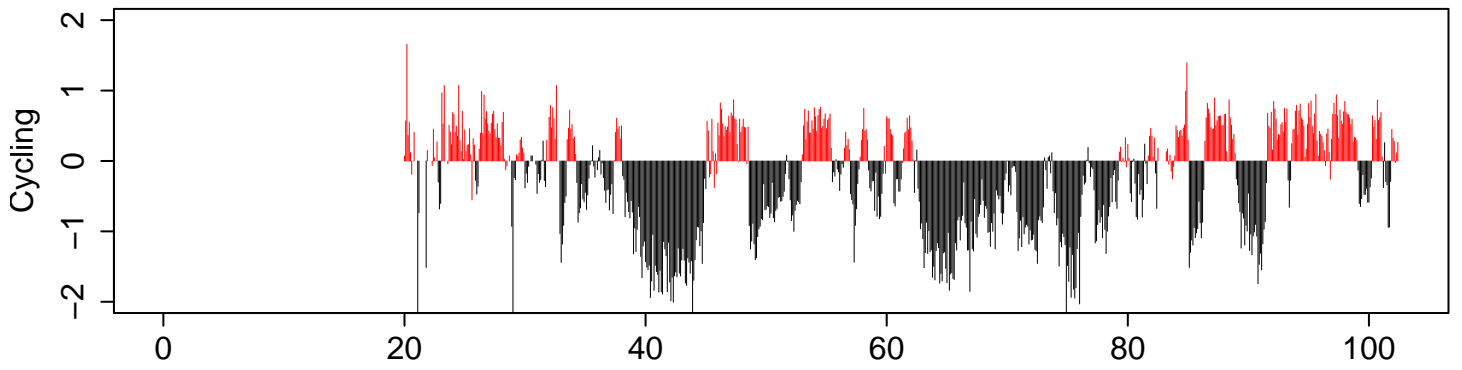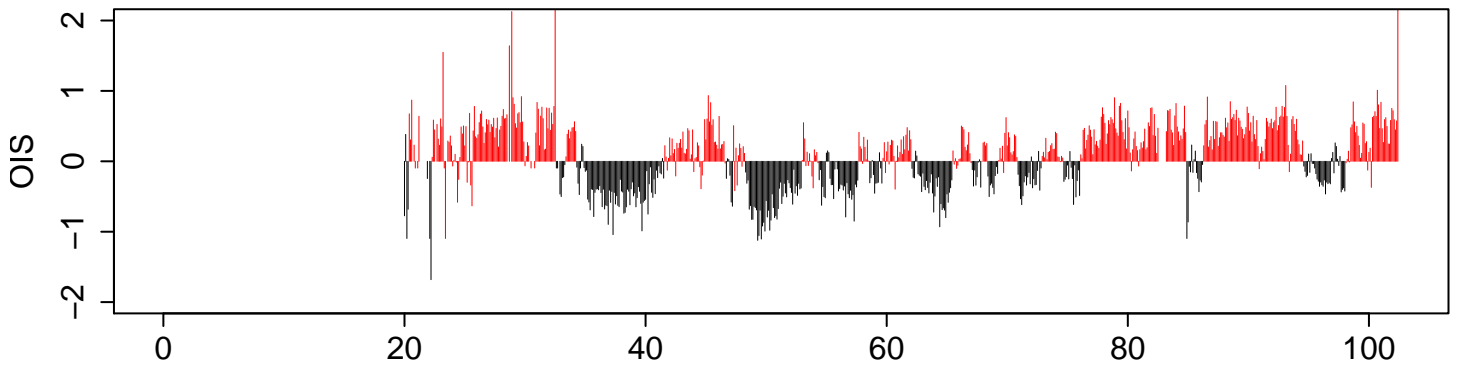

Position in Mb - chr15

### Change LMNB1 Interaction

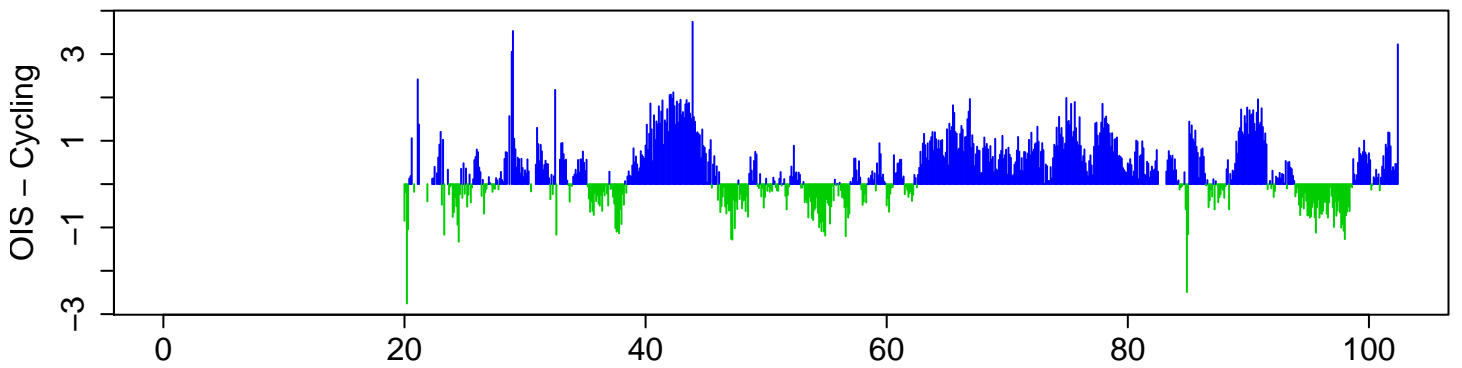

Position in Mb - chr15

### LMNB1 interaction (log2)

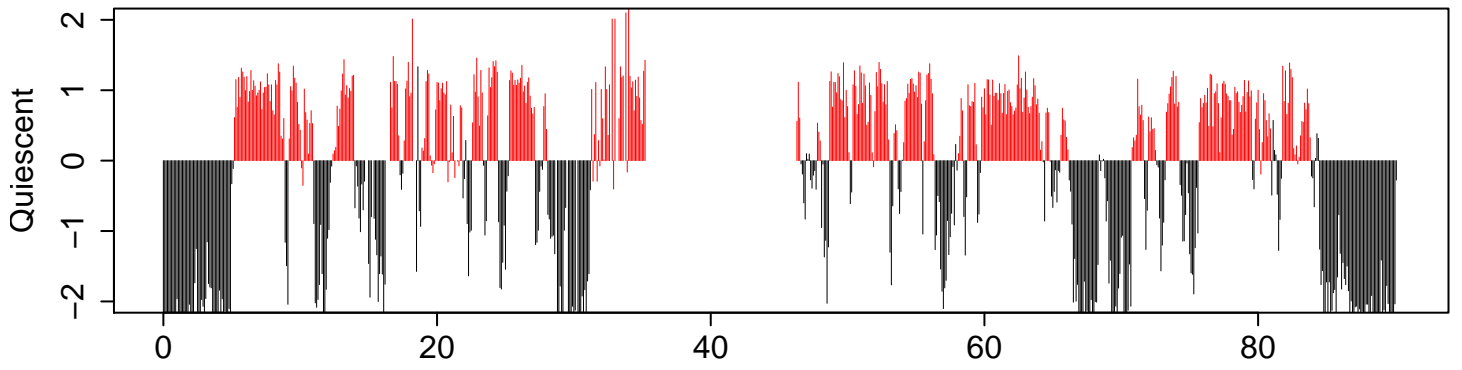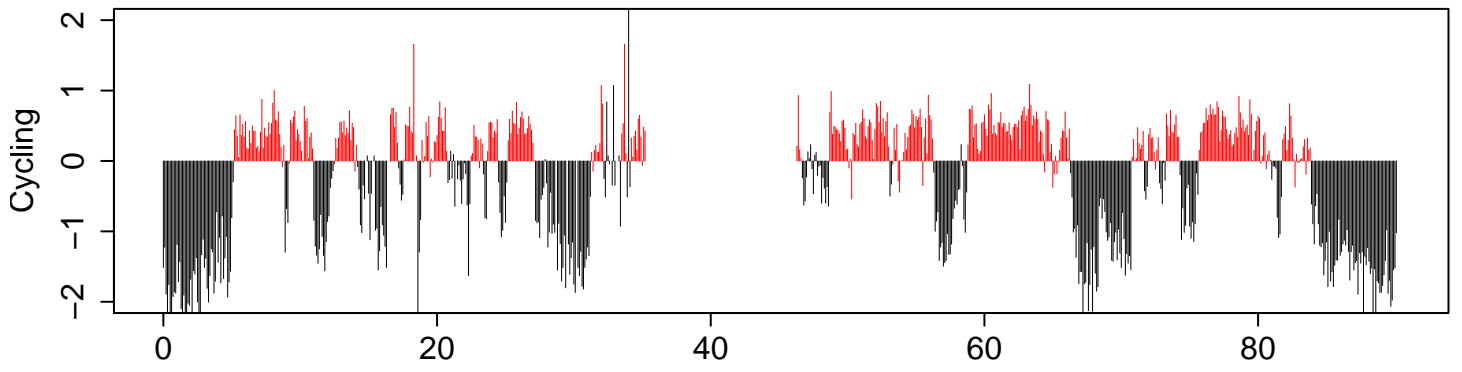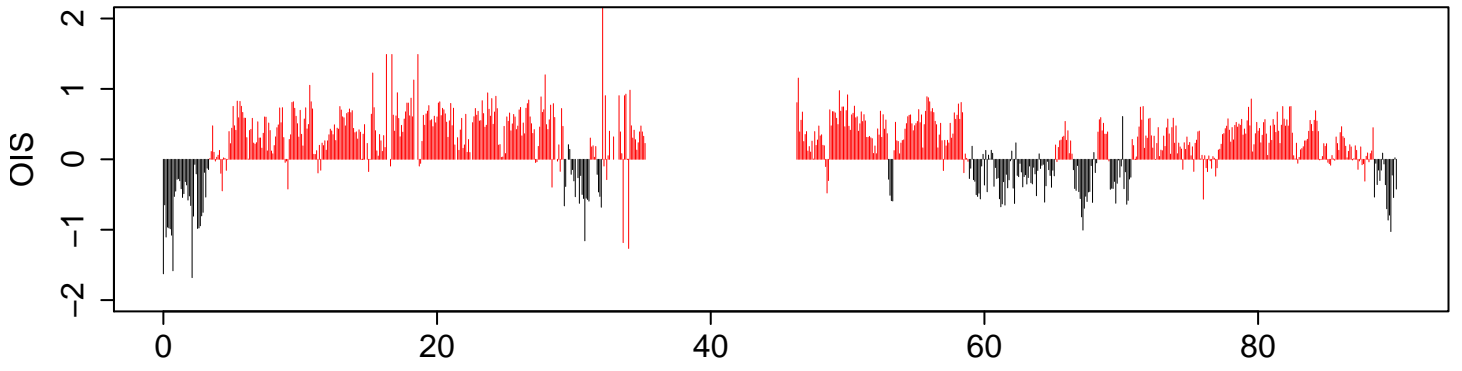

### Change LMNB1 Interaction

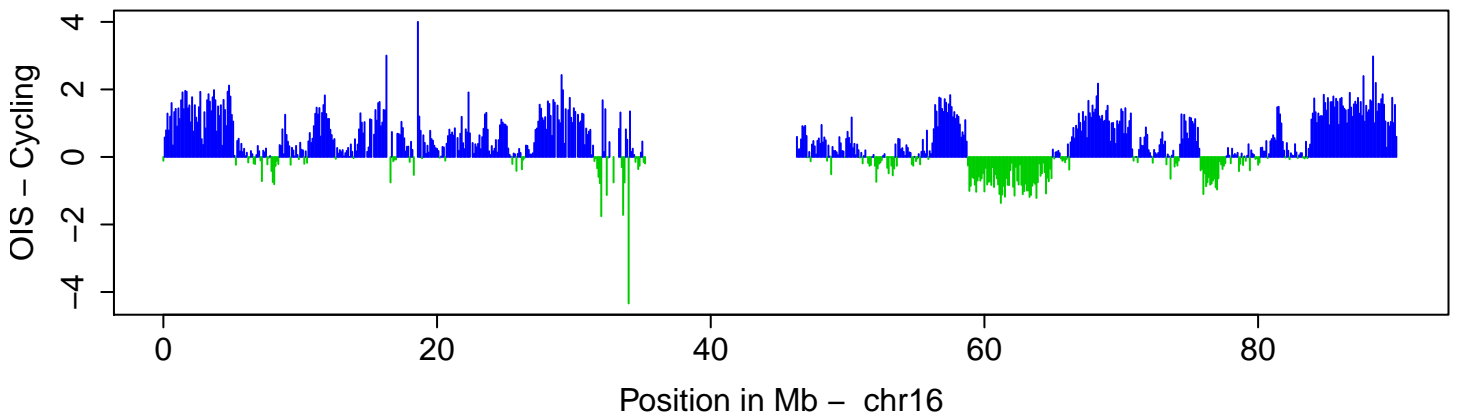



### LMNB1 interaction (log2)

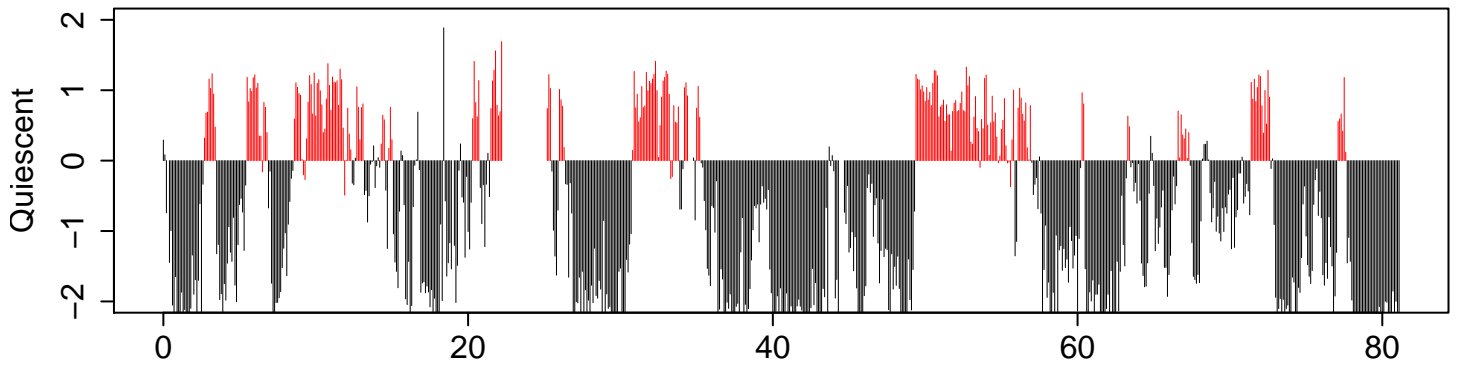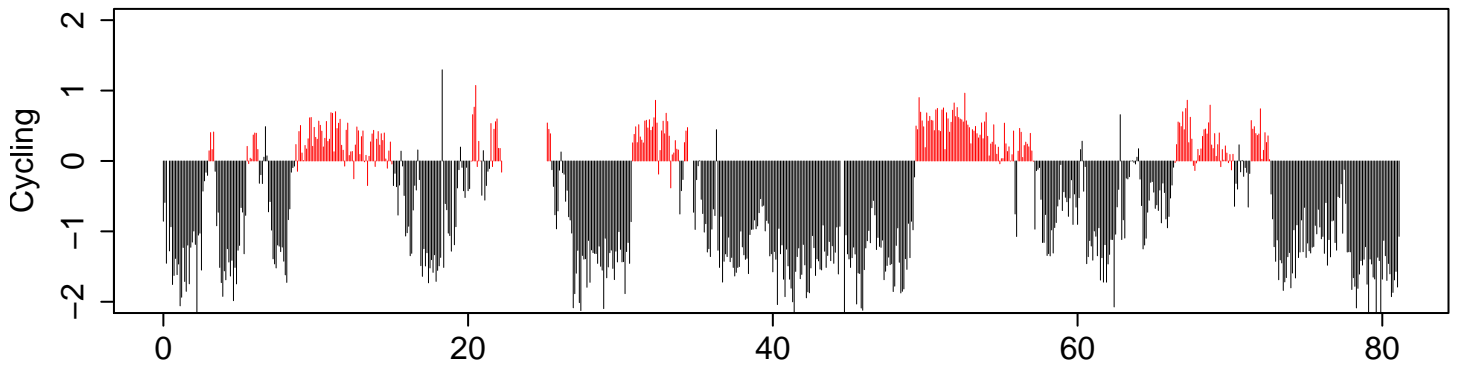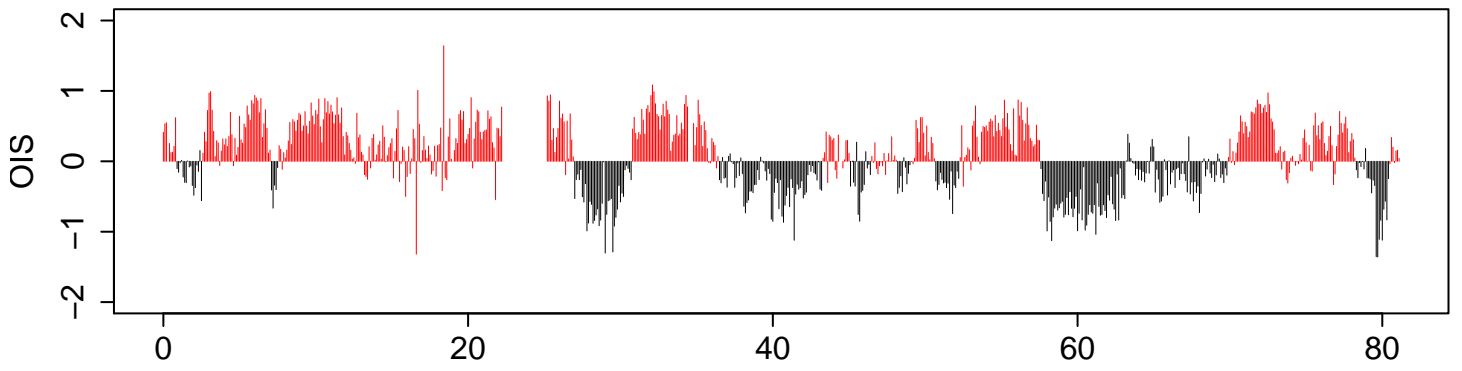

Position in Mb - chr17

### Change LMNB1 Interaction

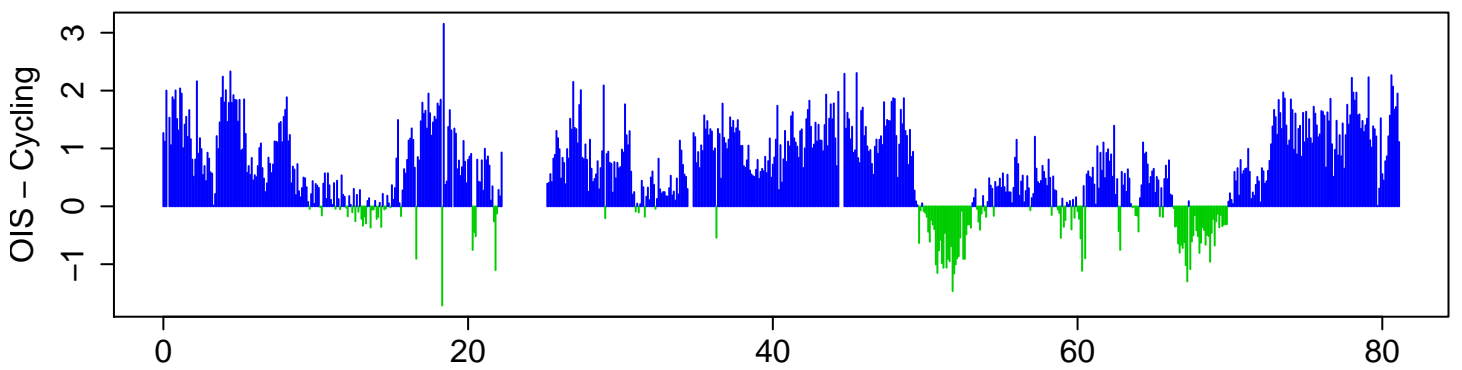

Position in Mb - chr17

### LMNB1 interaction (log2)

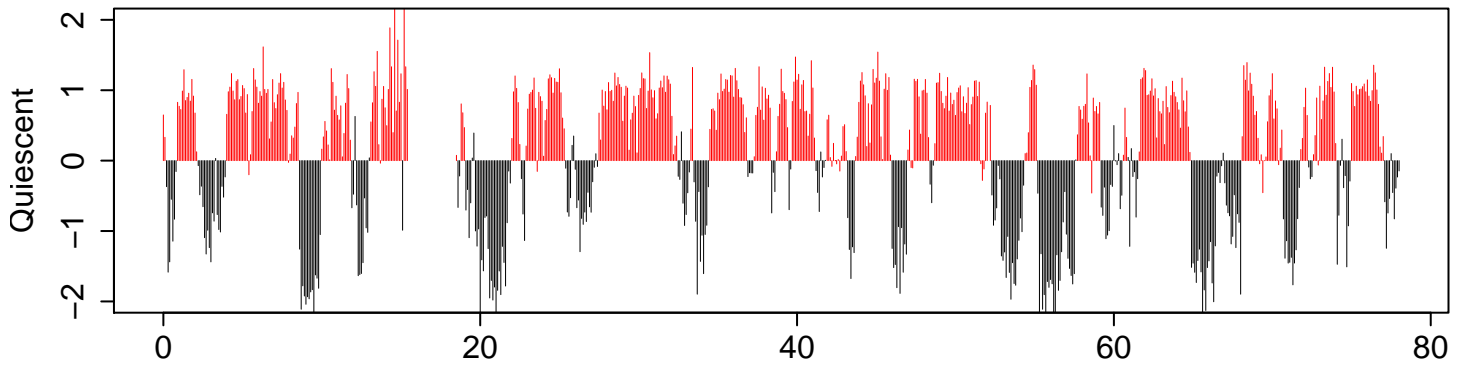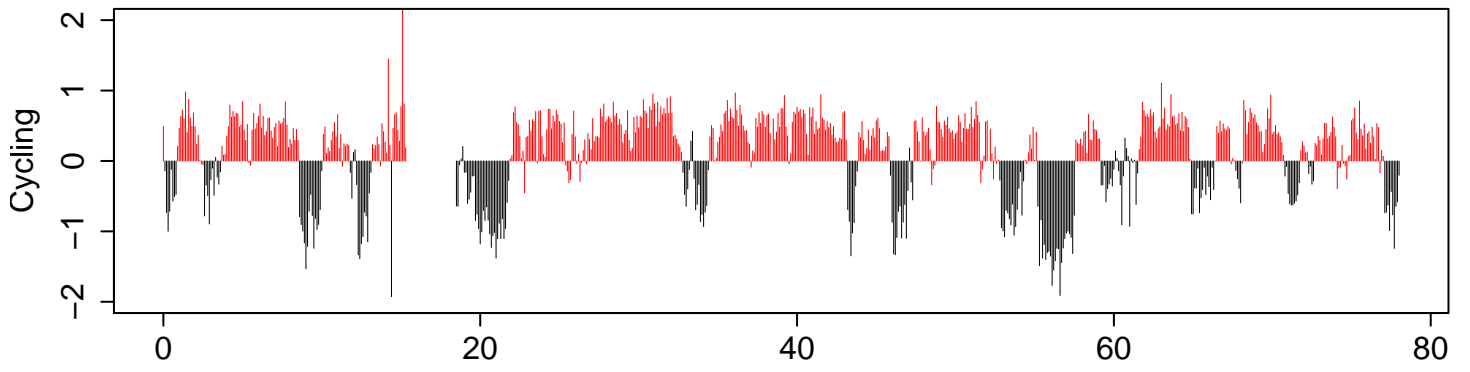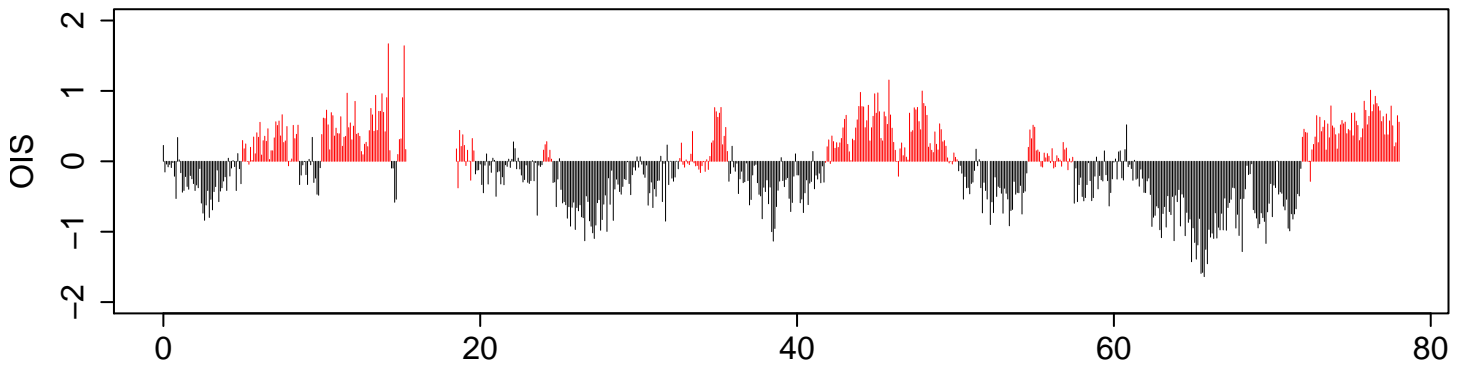

### Change LMNB1 Interaction

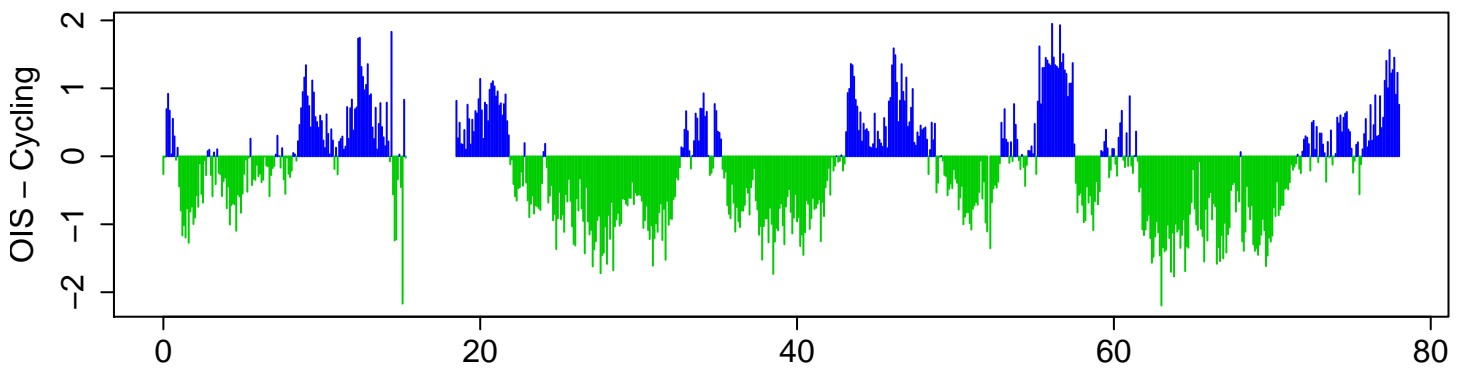

### LMNB1 interaction (log2)

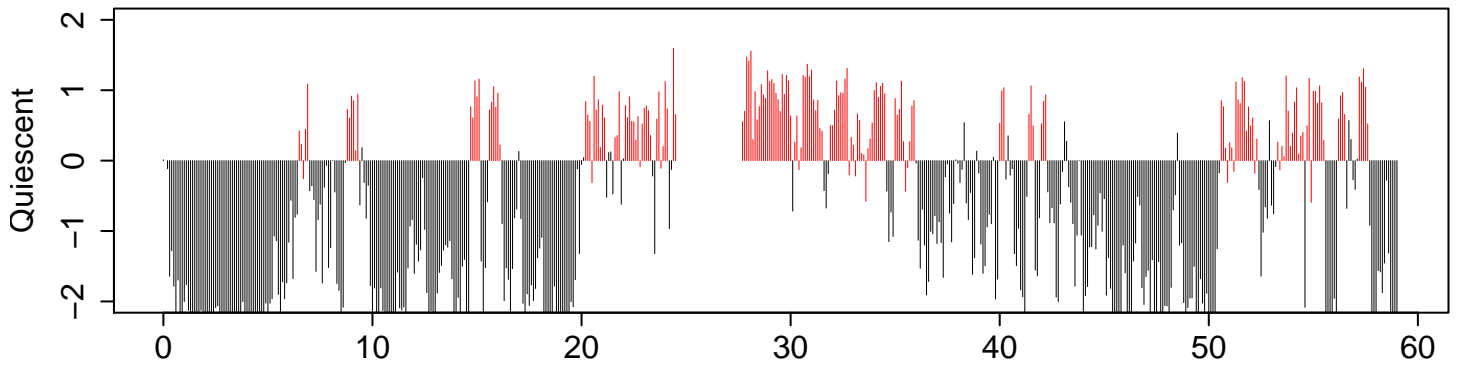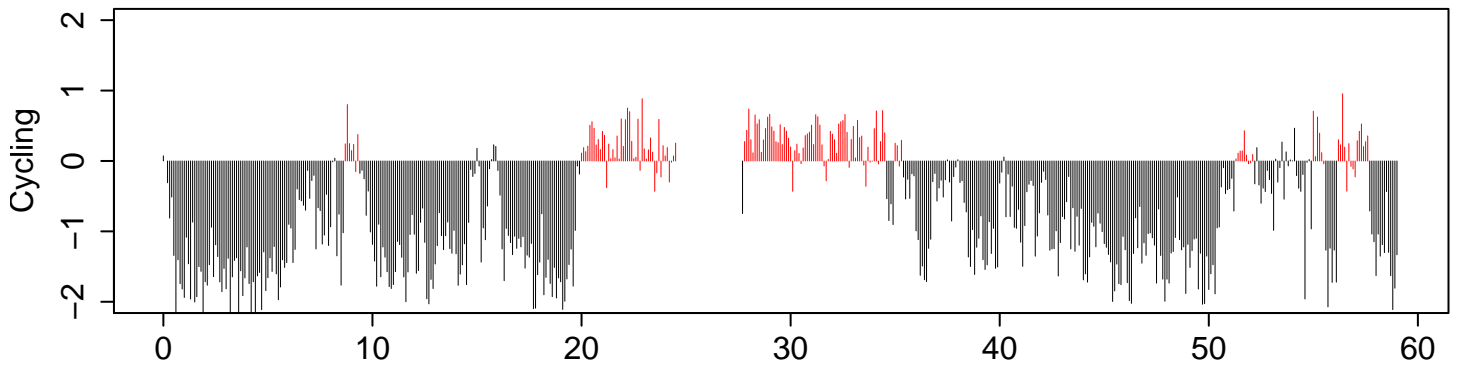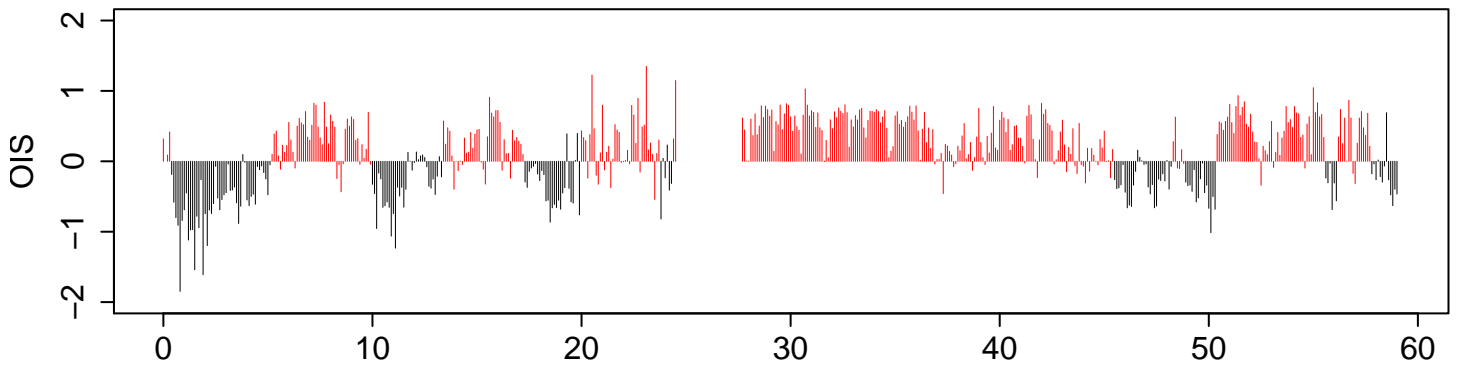

Position in Mb - chr19

### Change LMNB1 Interaction

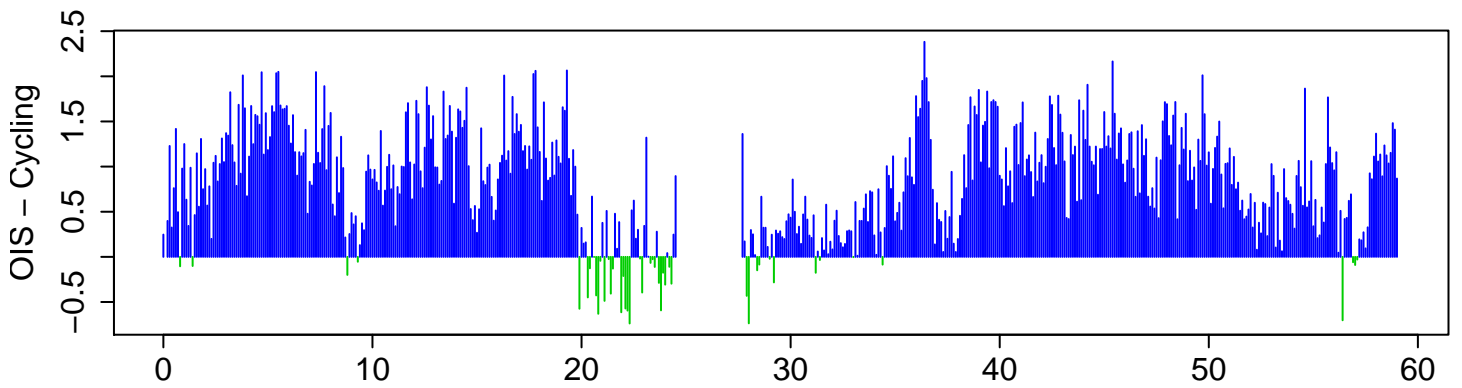

Position in Mb - chr19

### LMNB1 interaction (log2)

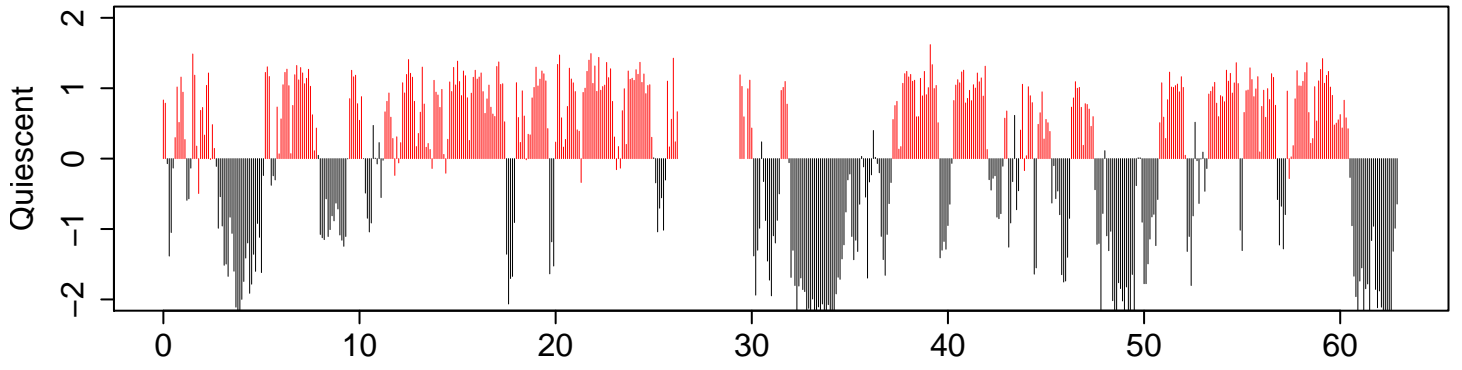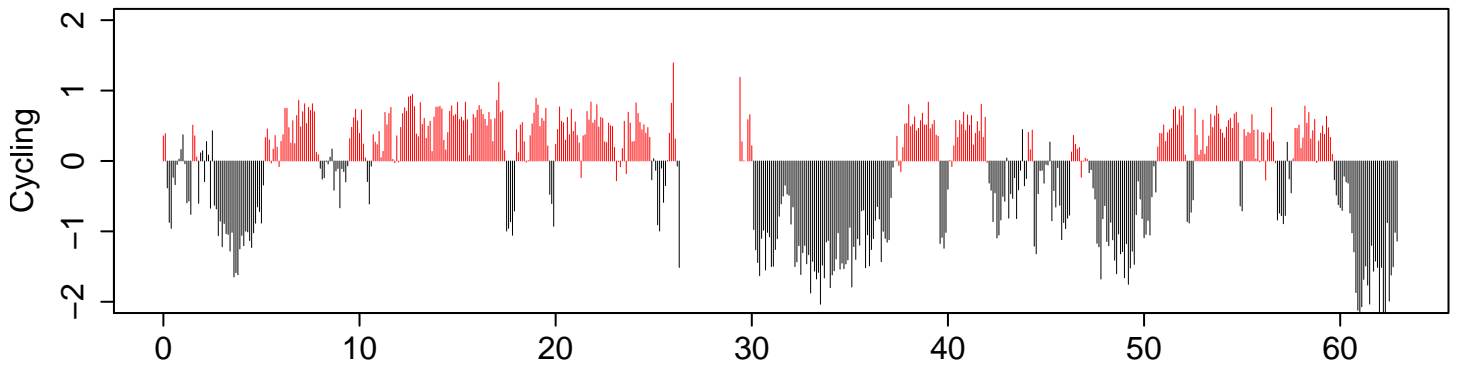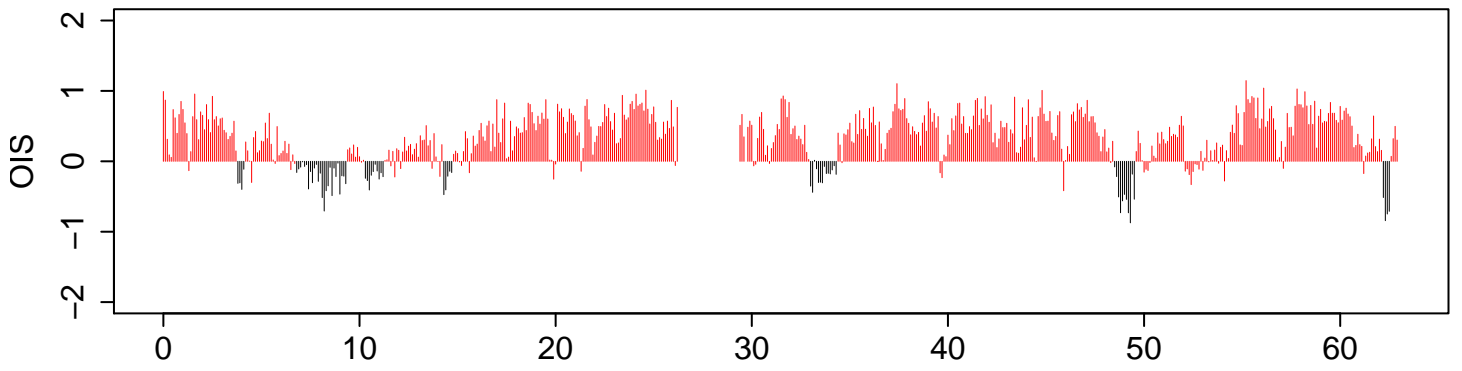

### Change LMNB1 Interaction

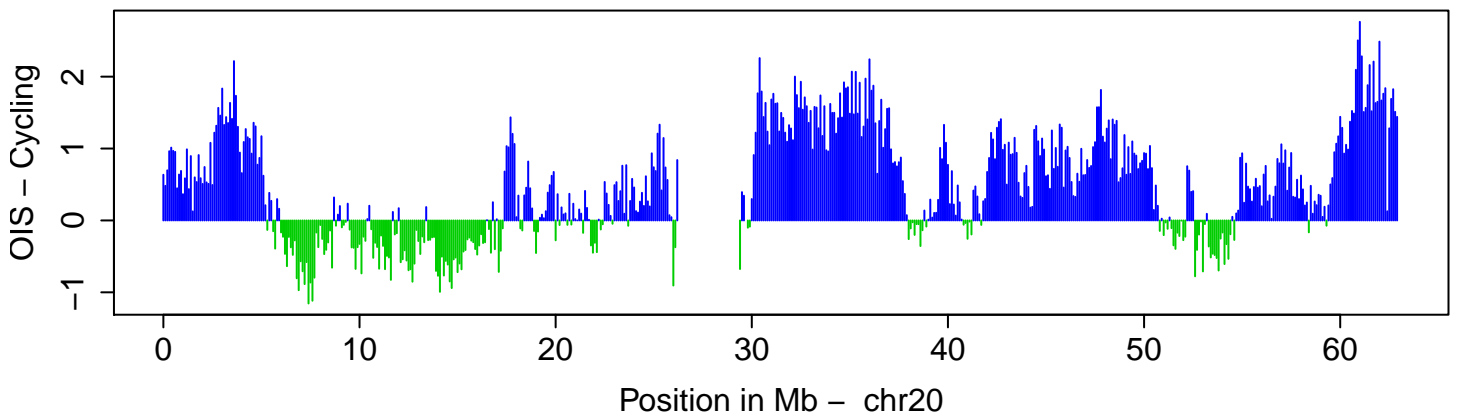

### LMNB1 interaction (log2)

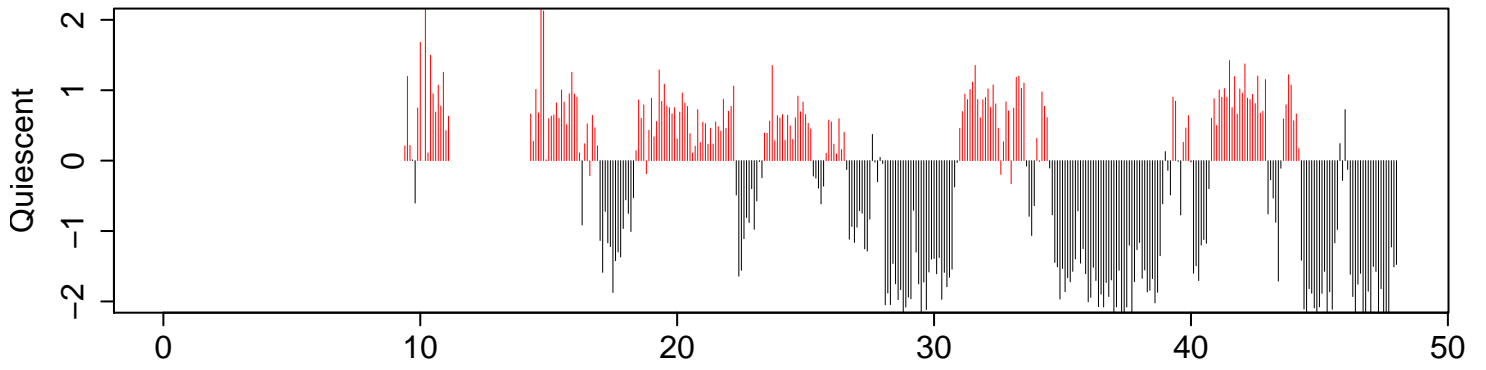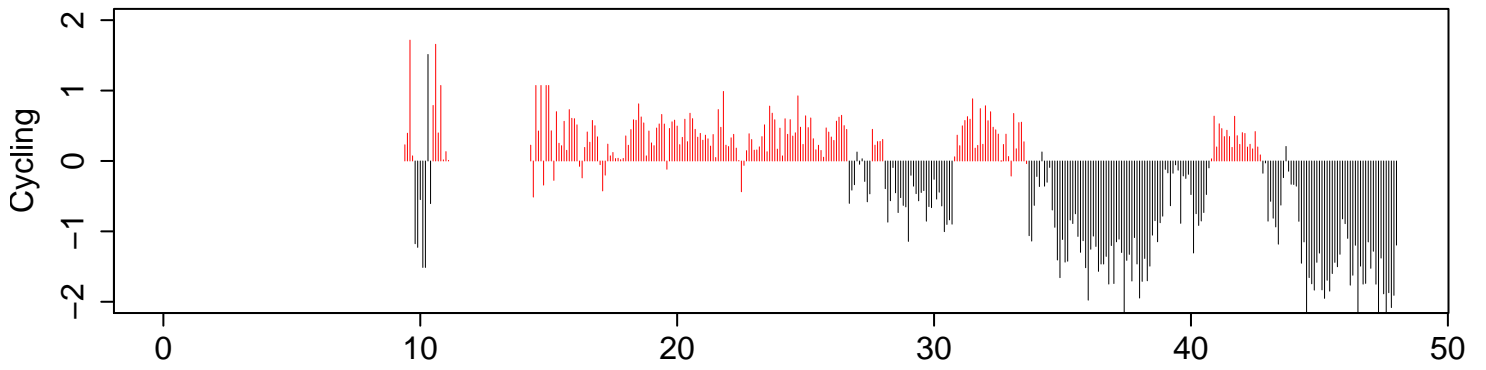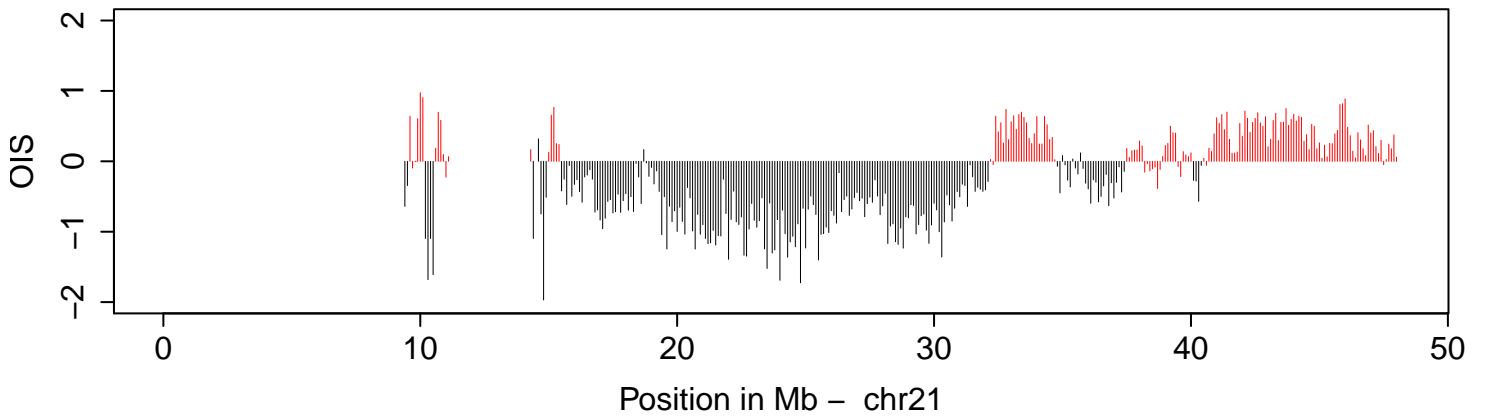

### Change LMNB1 Interaction

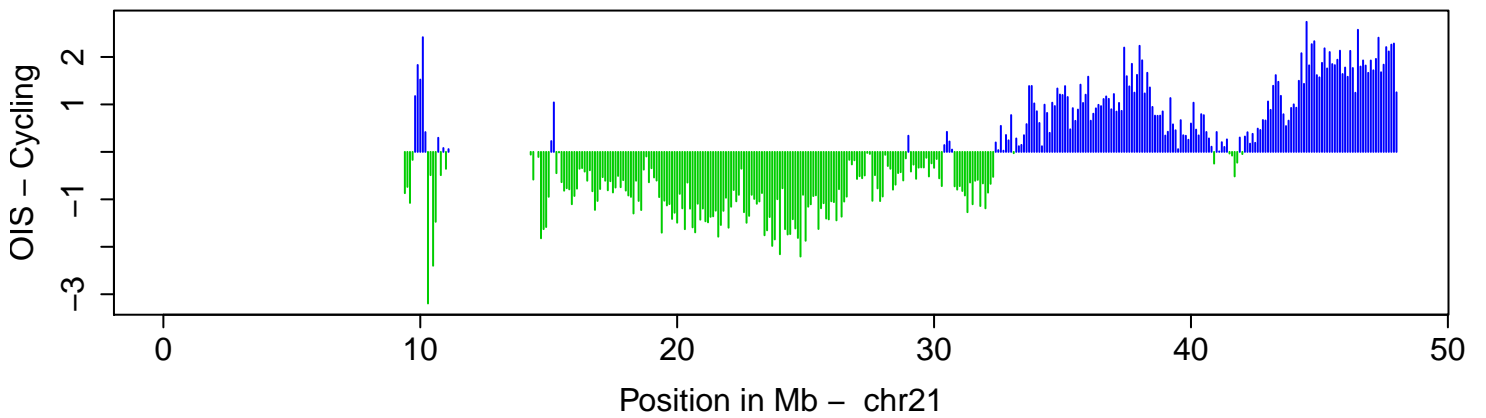

**LMNB1 interaction (log2)**

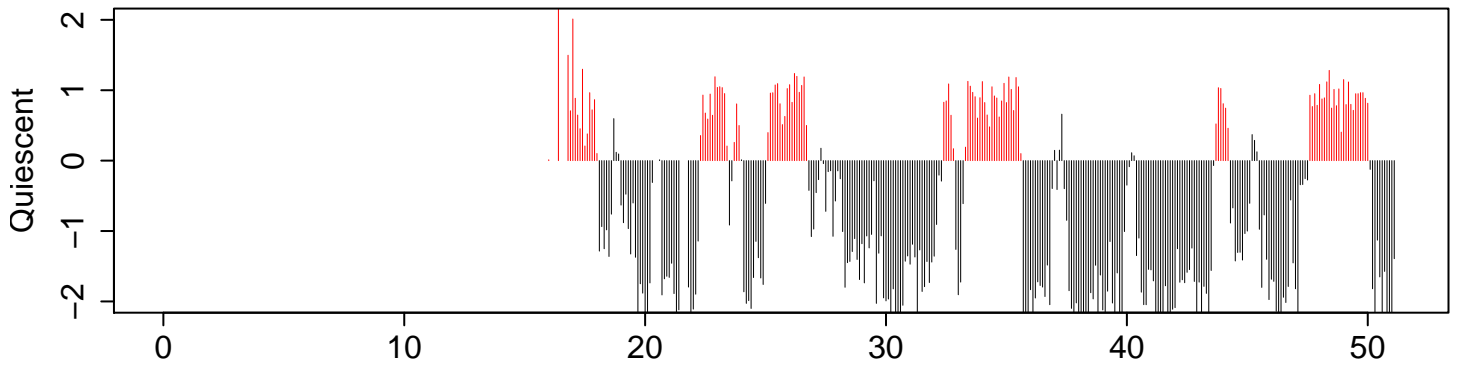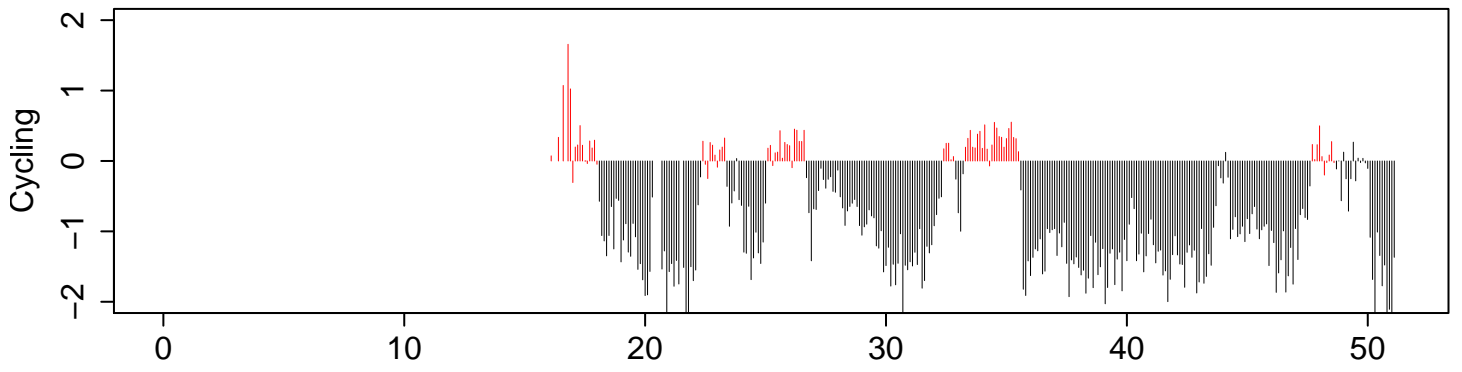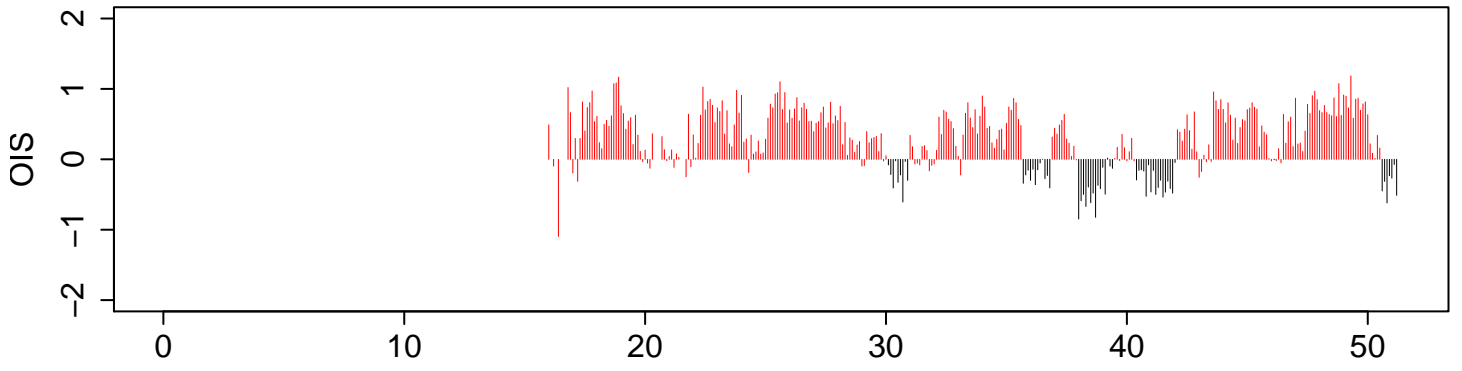

**Change LMNB1 Interaction**

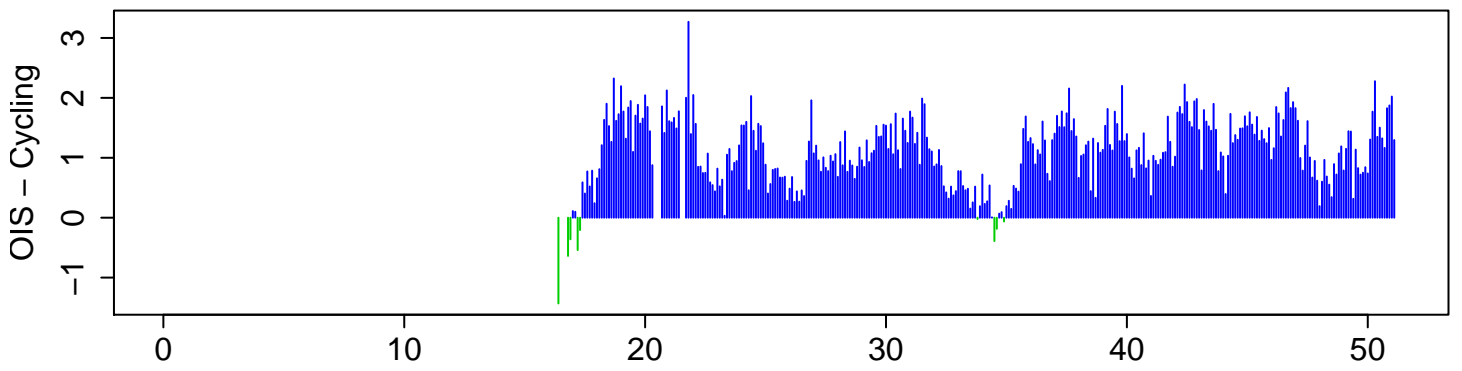

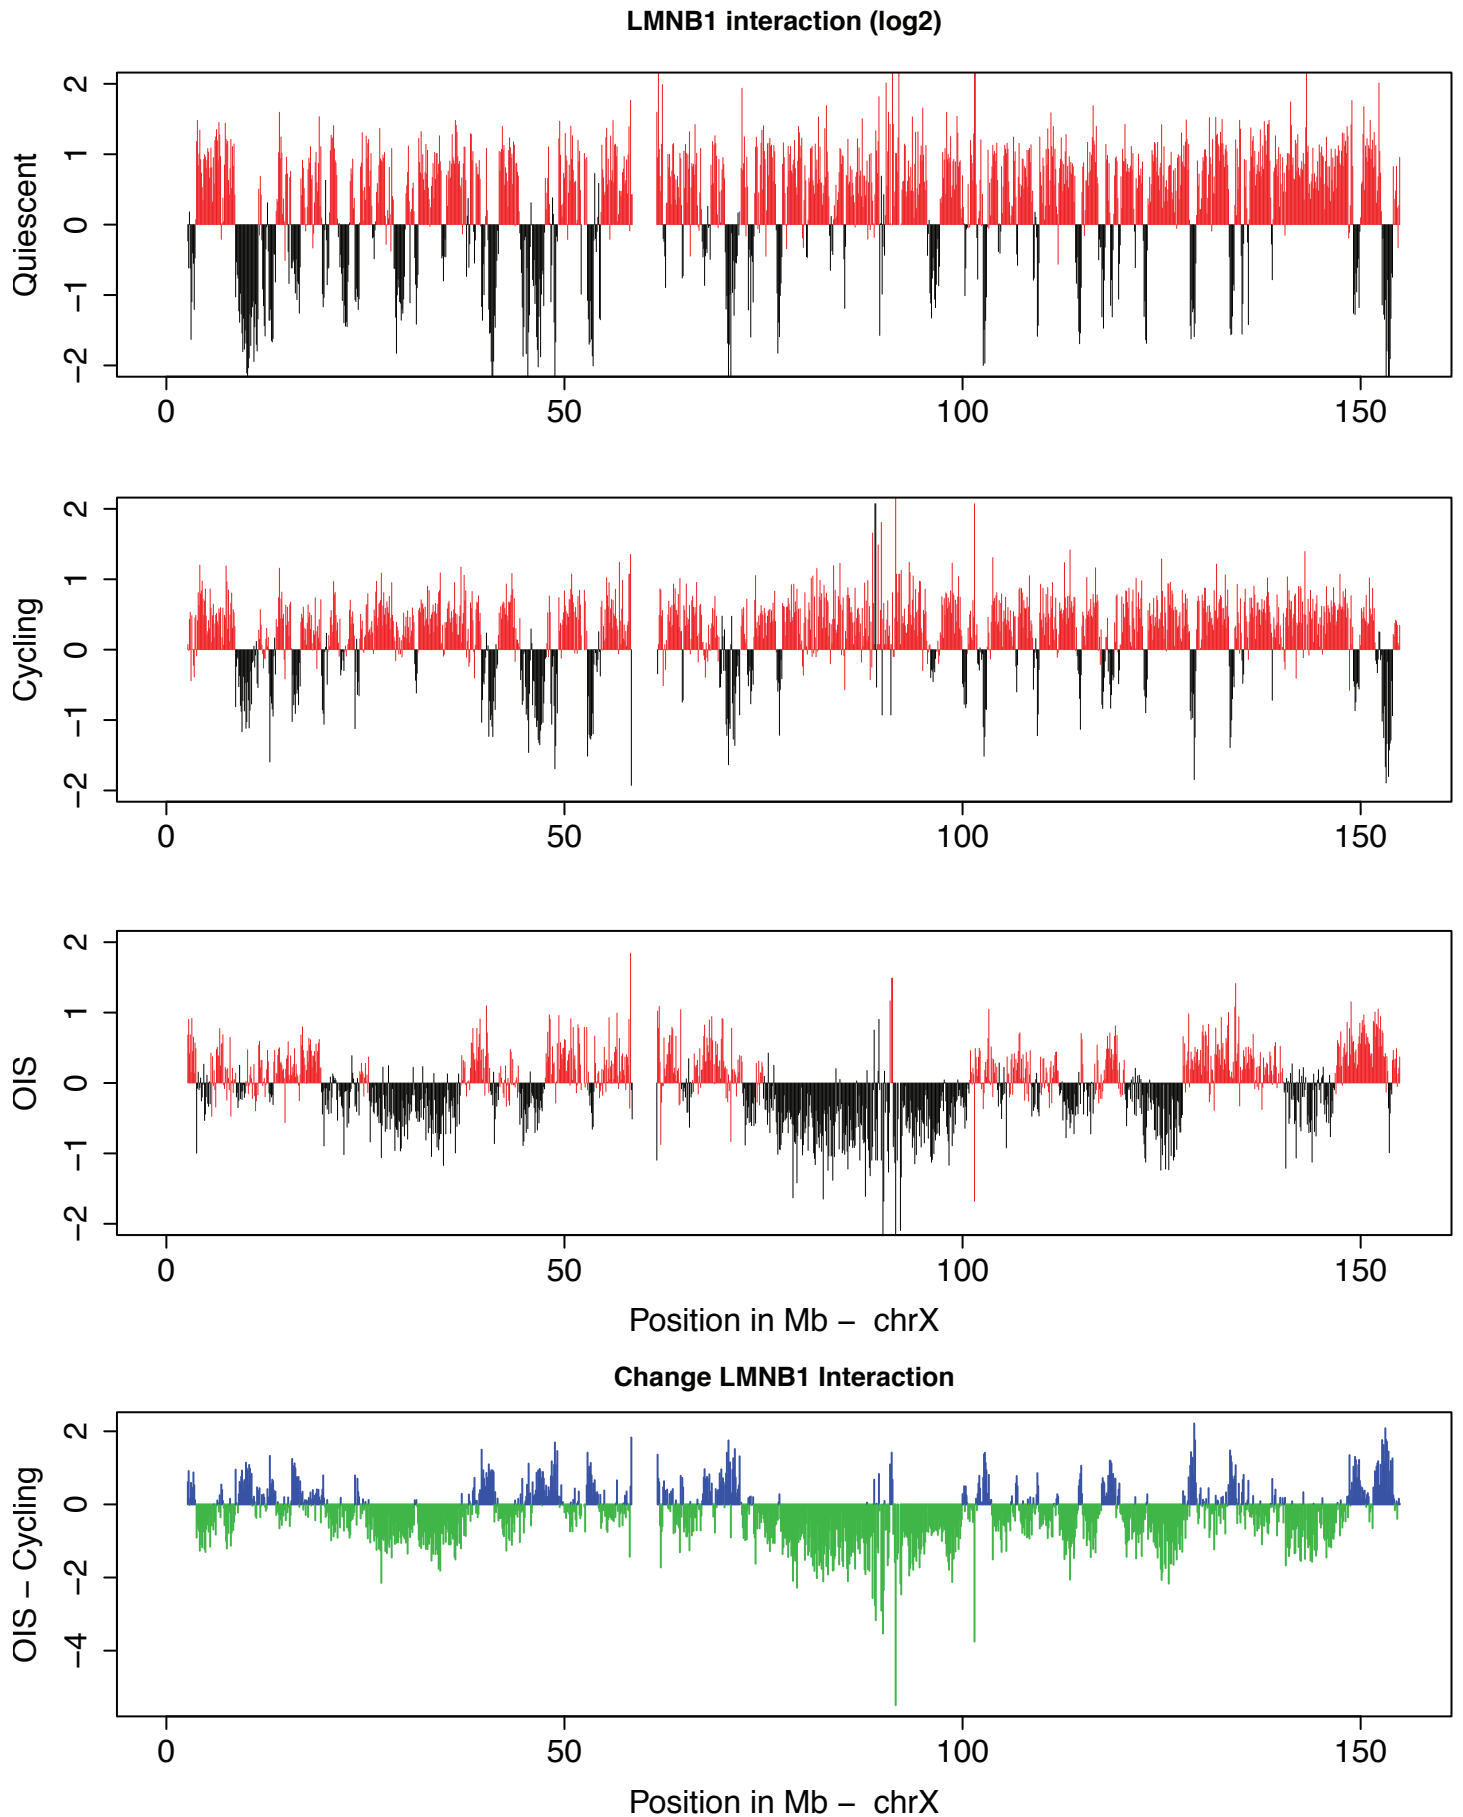

**Supplemental figure S2: Genome-NL interaction profiles along all chromosomes in quiescent cells after 10 days of serum starvation, cycling and OIS cells 10 days after retroviral transduction. Y-axis represents log2 of Dam-LMNB1 over Dam-only methylation ratio. The blue/green peaks show the changes in LMNB1 interaction in OIS cells (compared to cycling) for all chromosomes.**
