# Supplementary material for: Massive reshaping of genome–nuclear lamina interactions during oncogene-induced senescence
Source: PubMed Central journal article supplement — Genome Res. 2017 Oct;27(10):1634–44. doi: 10.1101/gr.225763.117 (PMC5630027; doi:10.1101/gr.225763.117), 2017-10
Supplement: supp_gr.225763.117_Supplemental_Fig_S3.pdf [file supp_gr.225763.117_Supplemental_Fig_S3.pdf]

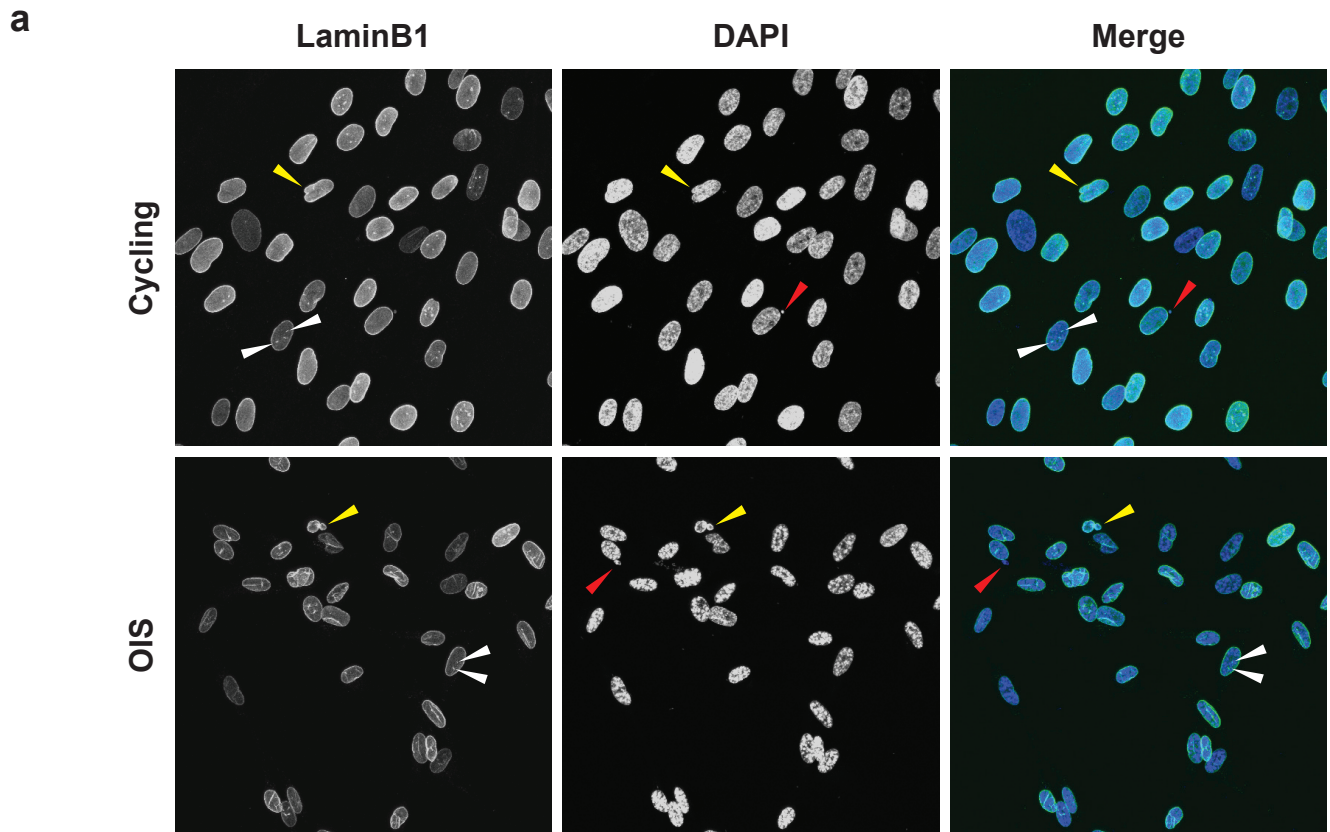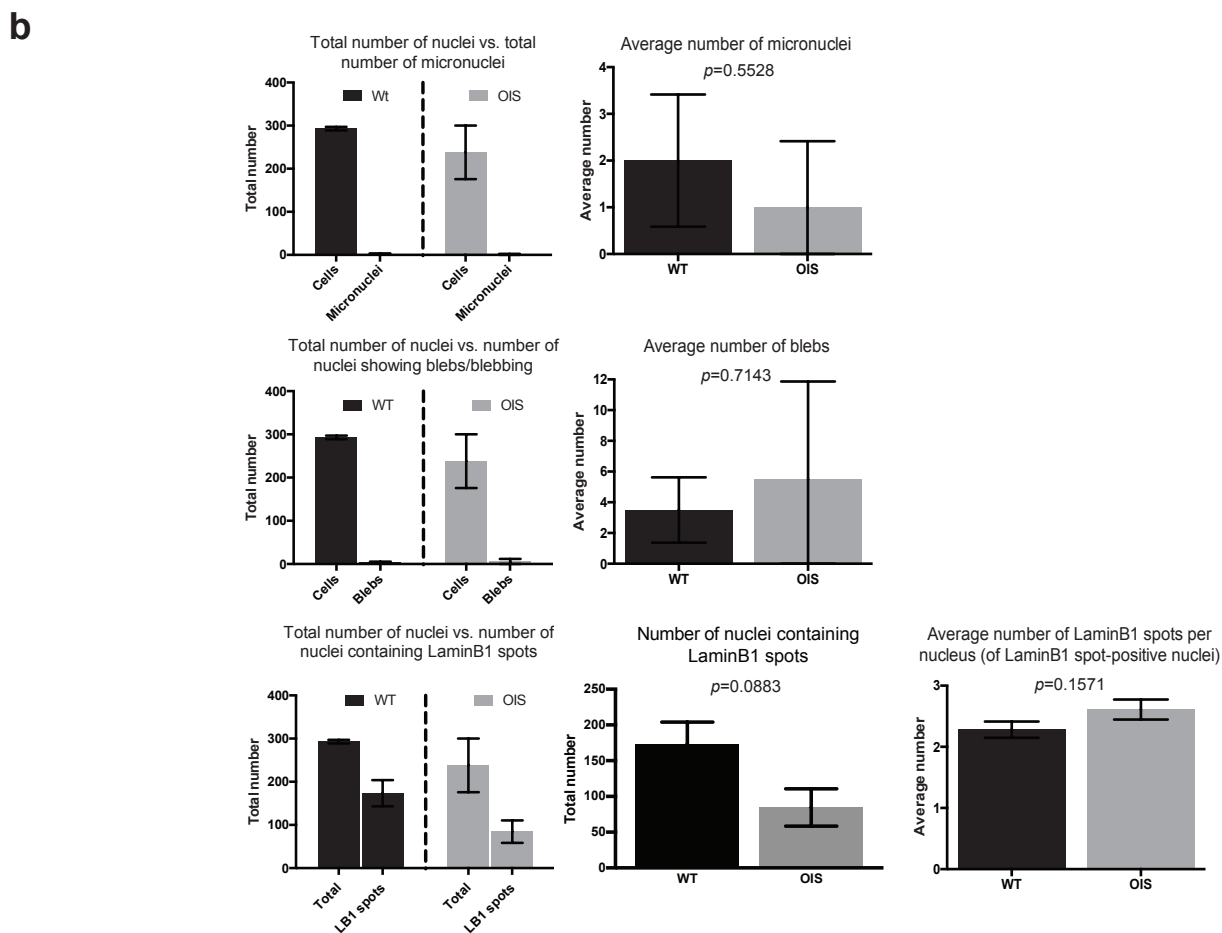

**Supplemental figure S3: OIS cells do not show an increase in formation of micronuclei or blebs and only a modest decrease in nuclei containing LaminB1 spots and invaginations. (A)** Overlay of LaminB1(green) / DAPI stained WT and OIS cells. Red arrows indicate micronuclei, yellow arrows blebs and white arrows LaminB1 spots and invaginations. **(B)** Quantification of nuclear morphological characteristics in WT (black bars) vs OIS (grey bars) cells. Cells from two independent experiments were scored for appearance of micronuclei, formation of blebs, number of nuclei displaying LaminB1 spots/invaginations and the average number of LaminB1 spots/invaginations per displaying cell. Values are shown as mean  $\pm$  S.D.; p-values were calculated using a Student's T-test.
