# Supplementary material for: Massive reshaping of genome–nuclear lamina interactions during oncogene-induced senescence
Source: PubMed Central journal article supplement — Genome Res. 2017 Oct;27(10):1634–44. doi: 10.1101/gr.225763.117 (PMC5630027; doi:10.1101/gr.225763.117), 2017-10
Supplement: supp_gr.225763.117_Supplemental_Fig_S4.pdf [file supp_gr.225763.117_Supplemental_Fig_S4.pdf]

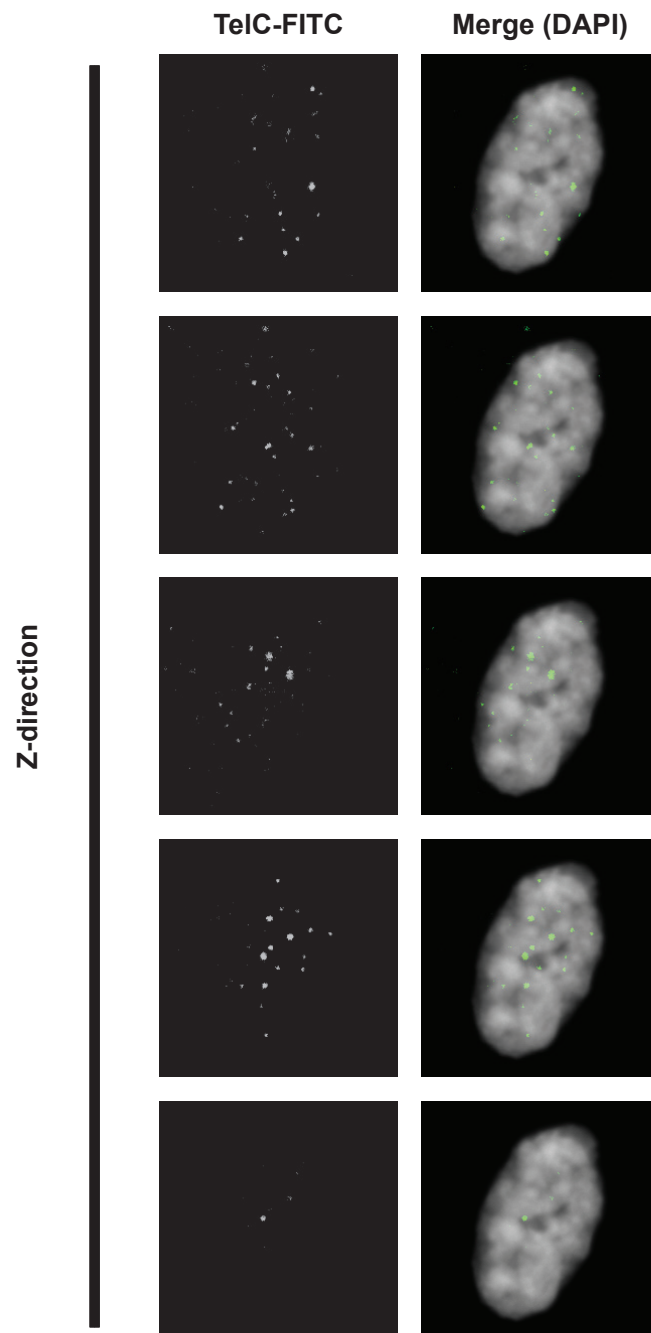

**Supplemental figure S4: Different spatial localization of telomeres marks absence of artificial flattening.** The resolution in z-direction is sufficient to discriminate telomere spots close by, or way from, the nuclear lamina. Shown are 5 z-sections (slices 8, 10, 12, 14, 16) of a nucleus with telomere FISH staining (grey) in the left-panel, and a merge of average DAPI staining (grey) and telomere FISH staining (green) in the right-panel. DAPI is averaged over all consecutive z-sections 8-16 to present a common background for the telomere spots. The distance between consecutive z-sections is  $0.504 \mu\text{m}$ , the distance between first and last z-sections in the figure is  $8 \times 0.50 = 4.03 \mu\text{m}$ .
