# Supplementary material for: Massive reshaping of genome–nuclear lamina interactions during oncogene-induced senescence
Source: HighWire-hosted journal article supplement (doi:10.1101/gr.225763.117), 2017-09-15
Supplement: Supplemental_Methods_.docx [file Supplemental_Methods_.docx]

Supplemental methods Lenain, De Graaf, *et al*.

**DamID sequencing**

Genomic DNA was isolated using the using Gentra Puregene Cell Kit according to the manufacturer’s instructions. To generate and amplify the Dam-methylated DNA fragments we used a modified version of the procedure described (Vogel et al. 2007).Briefly, 0.5 g of gDNA was subjected to digestion with DpnI restriction enzyme, followed by ligation to a double-stranded adaptor. The adaptor-ligated fragments were subsequently PCR-amplified using primers identical to the adaptor sequence and the 5’ TC nucleotides of the gDNA fragment. Then the methylPCR products were cleaned up using the QIAquick PCR product purification kit. Then DNA fragments were end-repaired using the END ITTM end repair kit (Epicentre) according to manufacturer’s instruction. The end-repaired DNA was A-tailed by incubating with 0.4 mM ATP in the presence of 25U of Klenow fragment (NEB) at 37°C for 30 min, then, 75°C for 20 min. DNA was subsequently purified using AMPureXP beads (Agencourt Biosciences) and ligated to the Illumina Y adaptor in a reaction containing 2.5 M Illumina Y adaptor and 2.5 U of T4DNA ligase and incubated at 16°C for 16 hours, followed by inactivation at 65°C for 10 min. The adaptor ligated DNA was purified with AMPureXP beads. 100 ng of purified DNA was amplified by 12 cycles in a reaction containing Illumina constant primer and Illumina index primer at a final concentration of 2.5 M, and 10 l of 2x MyTaq mix in a final volume of 20 l. Samples were then pooled, bead purified and size-selected. The library was single-end sequenced on one lane of Illumina HiSeq 2000.

DamID adaptors were trimmed from reads with cutadapt (Martin 2011). The genomic portion of the read was aligned to the hg19 genome with Bowtie 2 (Langmead and Salzberg 2012). Only reads with a unique mapping and quality score greater than 15 were retained. Any reads that did not map to a GATC site were then discarded before reads were pooled into bins of 50,000 bp (Supplemental Scripts). Dam-Lamin B1 read counts were then normalized by Dam-only read counts per bin, before a log2 transformation was applied. R scripts for DamID read processing are provided as Supplemental Code.

Only for the analysis of centromere interactions we aligned the reads to hg38, which includes more precise models of the centromeric regions. Because these regions are highly repetitive we did not filter on uniqueness of the alignment or on quality scores. Only reads aligning next to a GATC site were allowed. We determined the proportions of reads which align to a centromeric region in the DamLmnB1 data and the DamOnly data and report their ratio (DamLmnB1/DamOnly). The results are averaged over the two replicates.

**DpnII assay**

The DpnII assay is a PCR-based method for quantifying the amount of A6-methylation in cells infected with the DamID constructs (Kind et al. 2013). This assay consists of digestion of gDNA by DpnII, a restriction endonuclease that cuts only unmethylated GATC, followed by real-time PCR with primers that amplify loci within LADs or iLADs, as defined in control cycling Tig3ET cells, and containing a GATC site. One µg of gDNA was digested with ten units of DpnII restriction enzyme (NEB) at 37˚C for 16 hours. Ten ng of digests were combined with primers specific for the selected loci at a final concentration of 0.15mM and SYBR Green Master Mix (Roche) in a final volume of 10 l. Mock digestions without DpnII were also included. A reaction with primers amplifying a region not containing GATC was included to serve as an internal reference for amount of input gDNA. Real-time PCR was performed on the Light Cycler 480 instrument II (Roche).

**SINE probe design and SINE FISH**

SINE elements were PCR-amplified from human genomic DNA with primers based on the *Alu* consensus from <http://bioinfo.ut.ee/cgi-bin/primer3-0.4.0/cat_humrep_and_simple.cgi>, resulting in a ±230bp PCR product. Primer sequences are: Fwd: 5’ ATCCCAGCACTTTGGGAGGCCGAGGC 3’, Rev: 5’ CCCAGGCTGGAGTGCAGTGGCGCG 3’. PCR product was labeled with the FISH Tag™ DNA Multicolor Kit (Molecular Probes, Invitrogen, F32951), using the amine-reactive AlexaFluor-555 dye. Briefly, instead of using the nick-translation reaction to incorporate amine-modified dUTPs in our probe, as provided with the kit, we incorporated aminoallyl-dUTPs (Invitrogen, R1101) directly through PCR amplification, by supplementing the PCR reaction with dATP, dGTP, dCTP, dTTP and aa-dUTP in a ratio of 10:10:10:1:10. The resulting PCR product was then subjected to the fluorescent dye labeling procedure as described by the manufacturer’s protocol. FISH was performed on cycling and OIS cells seeded on collagen-coated coverslips and fixed with 4% paraformaldehyde for 15 min at room temperature. After gentle washing, cells were dehydrated and briefly air-dried. Hybridization-mix (10 mM Tris-HCl, pH7.2, 0,5% blocking reagent (Roche, 11 096 176 001), 70% formamide, 5 ng/ul probe) was denatured for 10 min. at 80°C and placed on ice. Cells were immersed in hybridization-mix and denatured for an additional 4 min. at 80°C under humidified conditions, and 4 min. dry. Hybridization was done o/n at 37°C in a humidified chamber. After several consecutive washing steps cells were stained with DAPI and mounted with Vectashield. Stained slides were imaged on a Leica TCS SP5 II Confocal microscope using 63x/ oil immersion objective and with Leica software. Images were acquired as Z-stacks using sequential scanning mode.

**Telomere FISH and distance of telomeres and centromeres to nuclear lamina**

Cycling and OIS cells were seeded on 8-wells chamber. The next day, cells were washed with 1x PBS and incubated with 2% paraformaldehyde at room temperature for 10 min, then incubated with 100% on ice for 10 min. After a wash with PBS, cells were dehydrated in 70%, 95% and 100% ethanol for 5 min each and then air-dried until hybridization. Ten microliter of a FITCOO- (CCCTAA)3 peptide nucleic acid custom probe (Biosynthesis)-hybridization buffer mixture was added. The probe and cells were co-denatured at 80°C for 8 min. Slides were hybridized over night in a humidified box chamber at room temperature. Slides were washed in 70% formamide in 10 mM Tris-HCL pH 7.4 twice for 15 min, then in 0.1M Tris-HCL pH 7.4, 0.15 M NaCl, 0.08% tween twice for 15 min. DAPI at a concentration of 0.25 mg/ml was added in the second wash. Slides were mounted using Vectashield (Vector Labs). Slides were imaged on Leica TCS SP5 II Confocal microscope using 63x/ oil immersion. Z-stack images were captured in 0.50 uM apart across the entire volume of the nuclei present in the field.

The location of the telomeric and centromeric spots was determined in the 3D confocal images using an ImageJ (Schneider et al. 2012) plugin 'Object Counter 3D' (Bolte and Cordelieres 2006). We identified the nuclear lamina (NL) based on Lamin B1 images (using the 'Triangle' method for autothresholding) in the single confocal sections through the approximate center of nuclei. For calculating the distance from telomeres and centromeres to the NL we considered only spots located in the central confocal section as the resolution in he z-direction is much less than within z-sections. The distance from spots to the NL was defined as the smallest distance from the spot to the NL in this confocal section. The telomere-NL distance distributions of the 2 samples were compared in R using custom scripts. All scripts are available upon request.

**Immunofluorescence**

Cells were seeded on coated slides at a density of 3 x104 cells per well for proliferating cells and 6.5 x104 cells per well for senescent cells. The next day, cells were washed with PBS and fixed with 2% formaldehyde in PBS at room temperature for 10 minutes. After 2 washes with PBS cells were permeabilized with 0.5% Triton X-100 in PBS for 10 minutes, and washed with PBS again. After a blocking step with 1X PBS 0.2% Tween and 5% serum (goat or FBS) for 30 minutes, the cells were incubated 1h at room temperature or overnight at 4C with the primary antibodies in blocking solution. The cells were then washed three times and incubated with 1X PBS, 0.02% tween and incubated with Alexa-488 or -561 coupled secondary antibodies for 1 hour at room temperature. After 3 washes, the cells were stained with DAPI at a 1:5000 dilution in 1X PBS for 5 minutes. Then the slides were dried and mounted with Vectashield. The antibodies used in this study were rabbit anti Lamin B1 (Abcam Ab16048), mouse anti-V5 (Invitrogen R960-25) and rabbit anti CENPB (SantaCruz sc22788). Stained slides were imaged on a Leica TCS SP5 II Confocal microscope using 63x/ oil immersion objective and with Leica software. Images were acquired as Z-stacks using sequential scanning mode.

**References**

Bolte S, Cordelieres FP. 2006. A guided tour into subcellular colocalization analysis in light microscopy. *J Microsc* **224**: 213-232.

Kind J, Pagie L, Ortabozkoyun H, Boyle S, de Vries SS, Janssen H, Amendola M, Nolen LD, Bickmore WA, van Steensel B. 2013. Single-cell dynamics of genome-nuclear lamina interactions. *Cell* **153**: 178-192.

Langmead B, Salzberg SL. 2012. Fast gapped-read alignment with Bowtie 2. *Nat Methods* **9**: 357-359.

Martin M. 2011. Cutadapt removes adapter sequences from high-throughput sequencing reads. *EMBnetjournal* **17**.

Schneider CA, Rasband WS, Eliceiri KW. 2012. NIH Image to ImageJ: 25 years of image analysis. *Nat Methods* **9**: 671-675.
